# Supplementary material for: Two Onnamide Analogs from the Marine Sponge Theonella conica: Evaluation of Geometric Effects in the Polyene Systems on Biological Activity
Source: MDPI journal article supplement (doi:10.3390/molecules28062524), 2023-03-09
Supplement: s1 [file s1]

## Supporting Information

### Two onnamide analogs from the marine sponge *Theonella conica*: evaluation of geometric effects in the polyene systems on biological activity

Fumiaki Nakamura <sup>1</sup>, Hiroshi Kimura <sup>2</sup>, Nobuhiro Fusetani <sup>3</sup>, and Yoichi Nakao <sup>1,3,\*</sup>

<sup>1</sup> Department of Chemistry and Biochemistry, Graduate School of Advanced Science and Engineering, Waseda University, 3-4-1 Okubo, Shinjuku-ku, Tokyo 169-8555, Japan

<sup>2</sup> Cell Biology Center, Institute of Innovative Research, Tokyo Institute of Technology, 4259 Nagatsuta, Midori-ku, Yokohama, 226-8501, Japan.

\* Correspondence: ayocha@waseda.jp; Tel.: +81-3-5286-3100

Table of contents

**Table S1.** <sup>1</sup>H NMR spectral data [ $\delta_{\text{H}}$  mult. (*J* in Hz)] for onnamides (**3-6**) in CD<sub>3</sub>OD (400 MHz).

**Table S2.** The integrated value of <sup>1</sup>H NMR signal derived from compounds **1** to **4** when **3** was placed in an NMR tube and each time passed.

**Figure S1.** ESI spectrum (pos.) of 2Z-onnamide A (**1**).

**Figure S2-1.** <sup>1</sup>H NMR spectrum of 2Z-onnamide A (**1**) in MeOD.

**Figure S2-2.** <sup>1</sup>H NMR spectrum of 2Z-onnamide A (**1**) in MeOD (5.6-7.6 ppm).

**Figure S3.** <sup>13</sup>C NMR spectrum of 2Z-onnamide A (**1**) in MeOD.

**Figure S4.** COSY spectrum of 2Z-onnamide A (**1**) in MeOD.

**Figure S5.** HMQC spectrum of 2Z-onnamide A (**1**) in MeOD.

**Figure S6.** HMBC spectrum of 2Z-onnamide A (**1**) in MeOD.

**Figure S7.** ESI spectrum (pos.) of 6Z-onnamide A (**2**) in MeOD.

**Figure S8-1.** <sup>1</sup>H NMR spectrum of 6Z-onnamide A (**2**) in MeOD.

**Figure S8-2.** <sup>1</sup>H NMR spectrum of 6Z-onnamide A (**2**) in MeOD (5.6-7.4 ppm).

**Figure S9.** <sup>13</sup>C NMR spectrum of 6Z-onnamide A (**2**) in MeOD.

**Figure S10.** COSY spectrum of 6Z-onnamide A (**2**) in MeOD.

**Figure S11.** HMQC spectrum of 6Z-onnamide A (**2**) in MeOD.

**Figure S12.** HMBC spectrum of 6Z-onnamide A (**2**) in MeOD.

**Figure S13.** <sup>1</sup>H NMR spectrum of onnamide A (**3**) in MeOD.

**Figure S14.** <sup>1</sup>H NMR spectrum of 4Z-onnamide A (**4**) in MeOD.

**Figure S15.** <sup>1</sup>H NMR spectrum of dihydroonnamide A (**5**) in MeOD.

**Figure S16.** <sup>1</sup>H NMR spectrum of onnamide B (**6**) in MeOD.

**Figure S17.** <sup>1</sup>H NMR spectrum of onnamide A (**3**) over time in MeOD.

**Figure S18.** Effects of onnamide A (**3**) on 16 types of histone modifications.

**Figure S19.** The levels of H3K4me3, H3K27me3, H3K36me3, and H4K5ac after onnamides (**1-6**) treatment in histone modification assay.

**Figure S20.** The cell numbers after onnamides (**1-6**) treatment in histone modification assay.

**Figure S21.** The levels of H3K4me3, H3K27me3, H3K36me3, and H4K5ac after onnamide A (**3**) and anisomycin treatment in histone modification assay.

**Table S1** <sup>1</sup>H NMR spectral data [ $\delta_{\text{H}}$  mult. (*J* in Hz)] for onnamides (3-6) in CD<sub>3</sub>OD (400 MHz).

| position | onnamide A (3)                      | 4Z-onnamide A (4)                   | dyhidroonnamide A (5)           | onnamide B (6)                      |
|----------|-------------------------------------|-------------------------------------|---------------------------------|-------------------------------------|
| 1        |                                     |                                     |                                 |                                     |
| 2        | 6.07 d (15.0)                       | 6.08 d (14.9)                       | 6.01 d (15.1)                   | 6.02 d (15.1)                       |
| 3        | 7.14 dd (15.0, 11.2)                | 7.67 dd (14.9, 12.0)                | 7.11 dd (15.1, 10.7)            | 7.12 dd (15.1, 10.8)                |
| 4        | 6.26 dd (14.9, 11.2)                | 6.00 dd (12.0, 11.2)                | 6.21 dd (15.1, 10.7)            | 6.26 dd (15.2, 10.8)                |
| 5        | 6.52 dd (14.9, 10.7)                | 6.28 t (11.2)                       | 6.10 dt (15.1, 6.8)             | 6.12 dt (15.2, 6.9)                 |
| 6        | 6.22 dd (15.1, 10.7)                | 6.72 dd (14.9, 11.2)                | 2.19 q (6.0)                    | -                                   |
| 7        | 5.95 dt (15.1, 6.9)                 | 5.97 dt (14.9, 7.3)                 | 1.46 m                          | -                                   |
| 8        | 2.22 m, 2.13 m                      | 2.19 m                              | 1.31 m, 1.35 m                  | 2.22 m, 2.16 m                      |
| 9        | 1.56 m, 1.42 m                      | 1.63 m, 1.48 m                      | 1.31 m, 1.46 m                  | 1.54 m, 1.44 m                      |
| 10       | 1.31 m, 1.50 m                      | 1.30 m, 1.49 m                      | 1.31 m, 1.46 m                  | 1.27 m, 1.50 m                      |
| 11       | 3.66 m                              | 3.66 m                              | 3.66 m                          | 3.66 m                              |
| 12       | 1.53 m                              | 1.54 m                              | 1.54 brt (6.1)                  | 1.53 m                              |
| 13       | 3.48 dd (8.4, 3.9)                  | 3.48 dd (8.9, 3.0)                  | 3.49 t (6.8)                    | 3.48 dd (8.8, 3.6)                  |
| 14       |                                     |                                     |                                 |                                     |
| 15       | 3.64 d (9.8)                        | 3.67 brd (9.9)                      | 3.65 d (9.4)                    | 3.65 d (9.9)                        |
| 16       | 4.17 dd (9.8, 6.6)                  | 4.17 dd (9.9, 6.5)                  | 4.17 dd (9.8, 6.5)              | 4.17 dd (9.9, 6.5)                  |
| 17       | 3.99 dd (9.3, 6.6)                  | 4.00 dd (9.4, 6.5)                  | 3.98 dd (9.3, 6.5)              | 3.98 dd (9.3, 6.5)                  |
| 18       | 5.80 d (9.3)                        | 5.81 d (9.4)                        | 5.81 d (9.3)                    | 5.81 d (9.3)                        |
| 20       |                                     |                                     |                                 |                                     |
| 21       | 4.24 s                              | 4.24 s                              | 4.24 s                          | 4.24 s                              |
| 22       |                                     |                                     |                                 |                                     |
| 23       | 2.41 brd (14.3),<br>2.32 brd (14.3) | 2.40 brd (14.0), 2.31 brd<br>(14.0) | 2.42 d (14.3), 2.33 d<br>(14.3) | 2.41 brd (14.3), 2.32 brd<br>(14.3) |
| 24       |                                     |                                     |                                 |                                     |
| 25       | 2.19 m                              | 2.19 m                              | 2.20 m                          | 2.19 m                              |
| 26       | 3.88 qd (6.5, 2.6)                  | 3.86 qd (6.5, 2.5)                  | 3.88 qd (6.5, 2.6)              | 3.88 qd (6.5, 2.5)                  |
| 27       | 1.18 d (6.5)                        | 1.17 d (6.5)                        | 1.18 d (6.5)                    | 1.18 d (6.5)                        |
| 28       | 0.97 d (7.0)                        | 0.95 d (7.0)                        | 0.97 d (7.0)                    | 0.97 d (7.0)                        |
| 29       | 4.79 brs, 4.65 brs                  | 4.79 brs, 4.64 brs                  | 4.79 brs, 4.65 brs              | 4.79 brs, 4.64 brs                  |
| 30       | 3.24 s                              | 3.21 s                              | 3.25 s                          | 3.24 s                              |
| 31       | 5.20d (6.9), 4.80 d<br>(6.9)        | 5.22 d (6.9), 4.79 d (6.9)          | 5.21 d (6.9), 4.80 d (6.9)      | 5.21d (6.9), 4.80 d (6.9)           |
| 32       | 3.56 s                              | 3.56 s                              | 3.56 s                          | 3.56 s                              |
| 33       | 0.86 s                              | 0.86 s                              | 0.87 s                          | 0.86 s                              |
| 34       | 1.01 s                              | 1.01 s                              | 1.01 s                          | 1.00 s                              |
| 1'       |                                     |                                     |                                 |                                     |
| 2'       | 4.37 dd (7.9, 5.3)                  | 4.40 dd (7.5, 5.0)                  | 4.37 dd (7.4, 5.2)              | 4.37 dd (7.8, 5.3)                  |
| 3'       | 1.90 m, 1.75 m                      | 1.91 m, 1.75 m                      | 1.90 m, 1.74 m                  | 1.87 m, 1.73 m                      |
| 4'       | 1.62 m                              | 1.63 m                              | 1.62 m                          | 1.62 q (9.5)                        |
| 5'       | 3.19 m                              | 3.22 m                              | 3.22 m, 3.17 m                  | 3.22 m, 3.16 m                      |
| 7'       |                                     |                                     |                                 |                                     |

**Table S2** The integrated value of  $^1\text{H}$  NMR signal derived from compounds **1-4** when **3** was placed in an NMR tube and each time passed (the integrated value of H-3 in **3** is set to “1”)

| compound/position                  | time (hour) |      |      |      |      |      |      |      |
|------------------------------------|-------------|------|------|------|------|------|------|------|
|                                    | 0           | 24   | 48   | 72   | 96   | 168  | 672  | 840  |
| onnamide A ( <b>3</b> )/H-3        | 1           | 1    | 1    | 1    | 1    | 1    | 1    | 1    |
| 2Z-onnamide A ( <b>1</b> )<br>/H-4 | 0.03        | 0.03 | 0.03 | 0.05 | 0.05 | 0.06 | 0.09 | 0.12 |
| 4Z-onnamide A ( <b>2</b> )<br>/H-3 | 0.02        | 0.02 | 0.02 | 0.02 | 0.04 | 0.04 | 0.08 | 0.13 |
| 6Z-onnamide A ( <b>4</b> )<br>/H-3 | n.d.        | n.d. | n.d. | n.d. | n.d. | 0.02 | 0.05 | 0.08 |

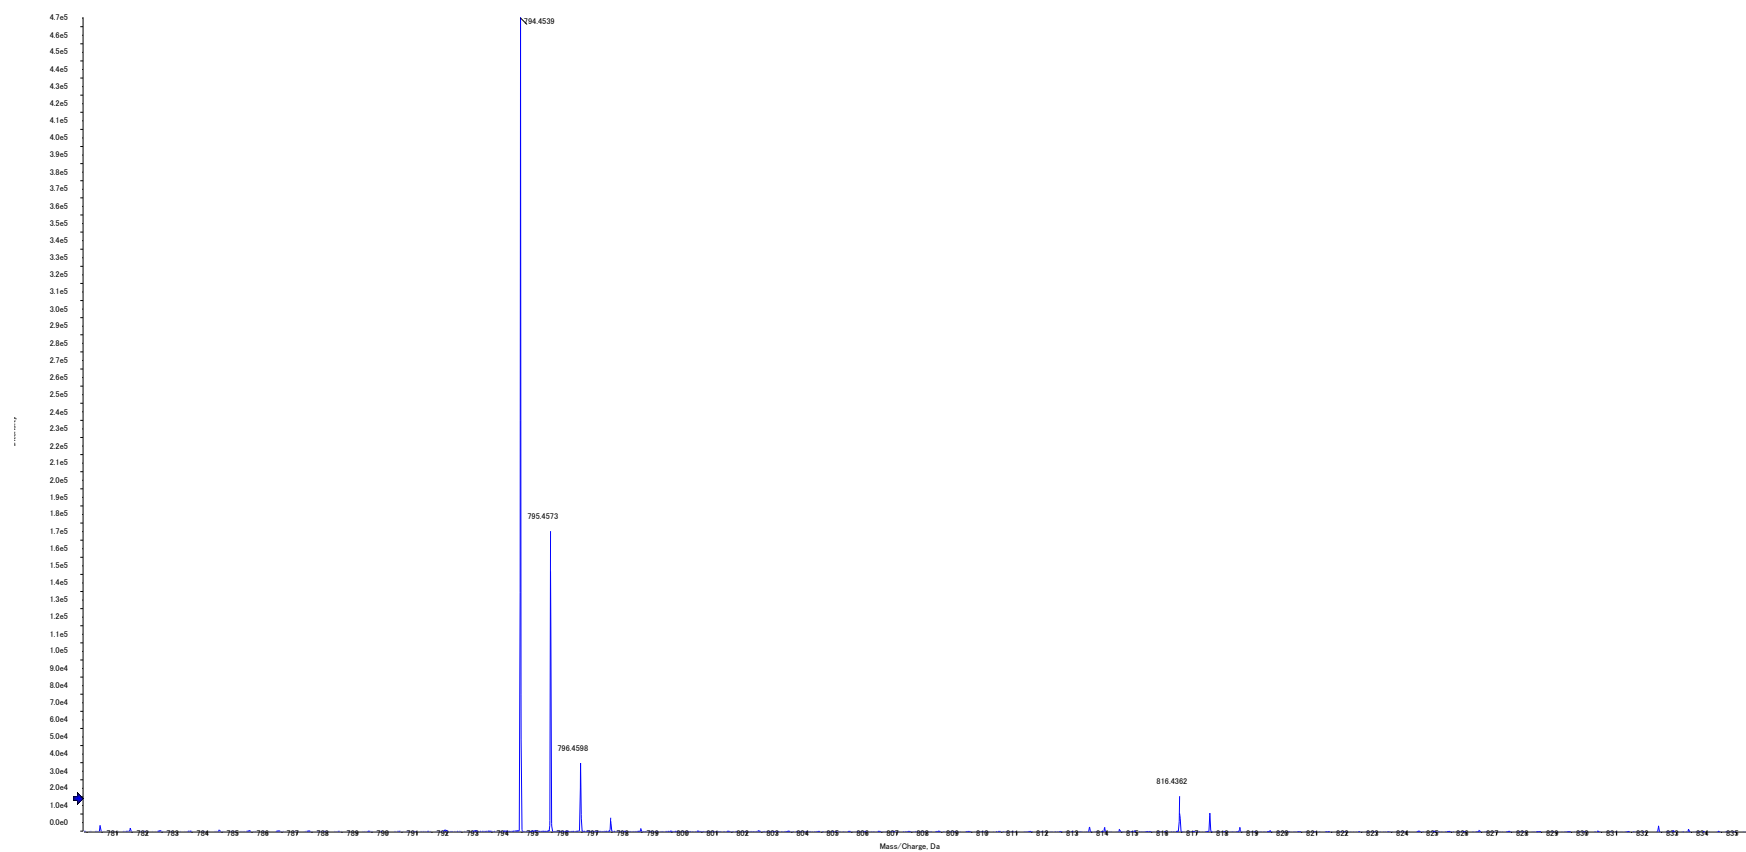

**Figure S1.** ESI spectrum of 2Z-onnamide A (**1**) in MeOD.

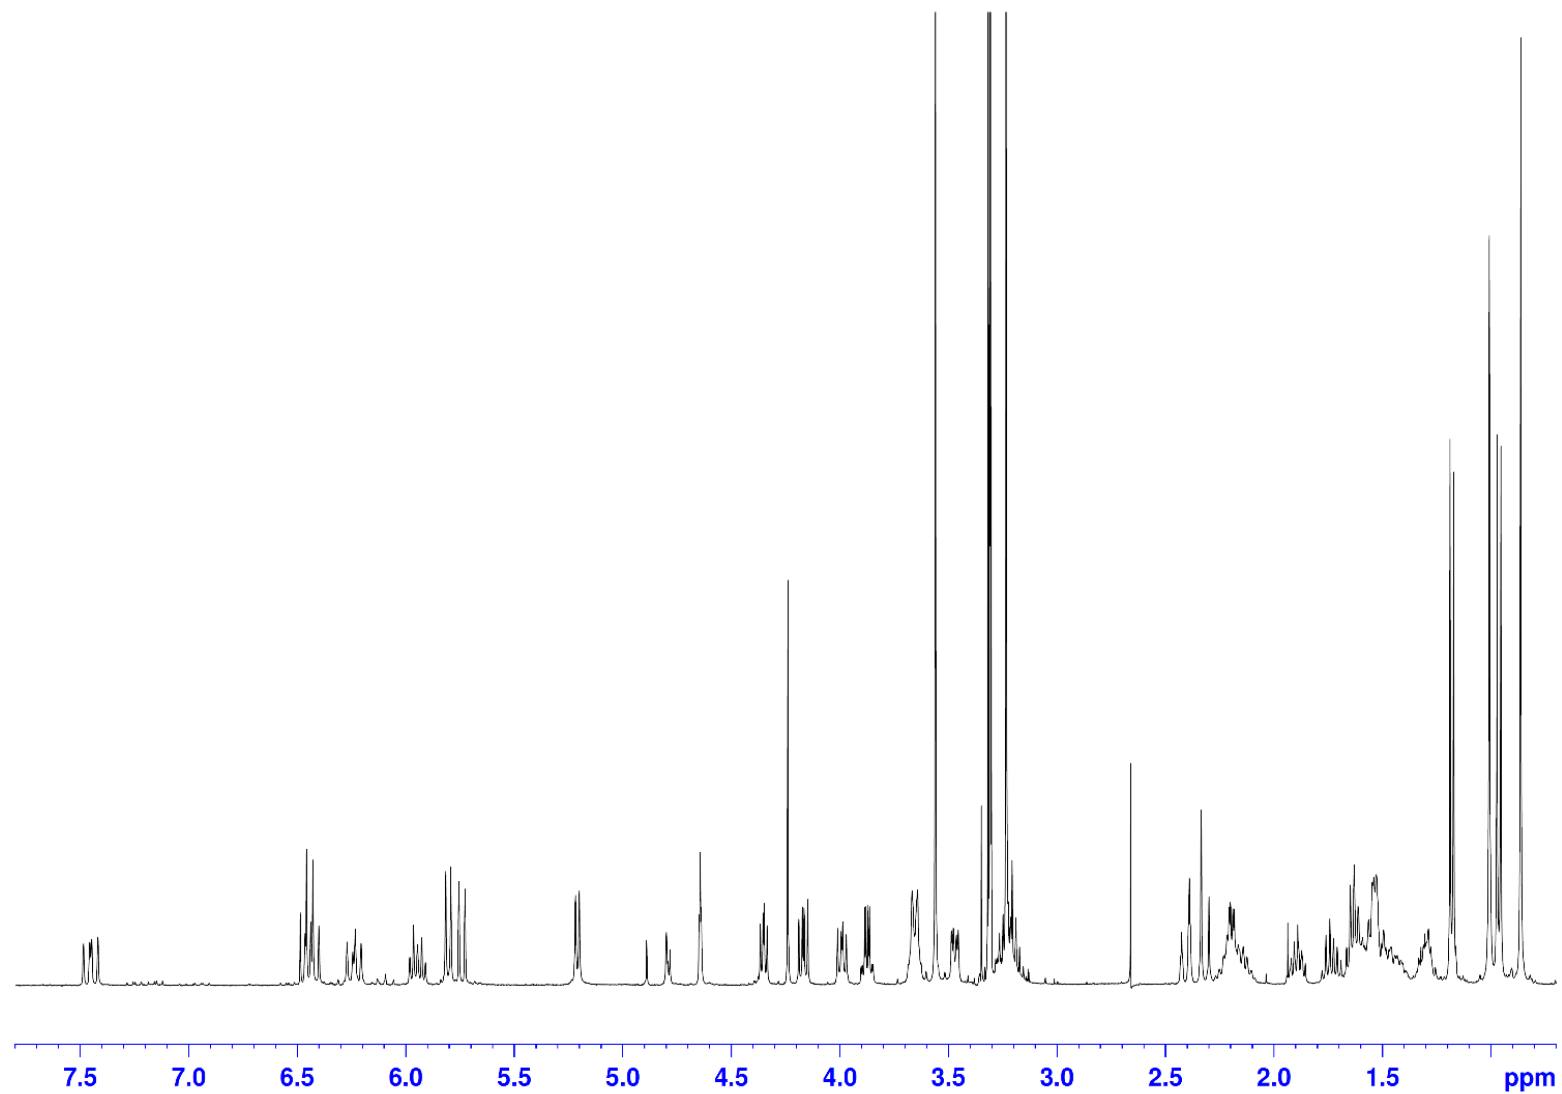

**Figure S2-1.**  $^1\text{H}$  NMR spectrum of 2Z-onnamide A (1) in MeOD.

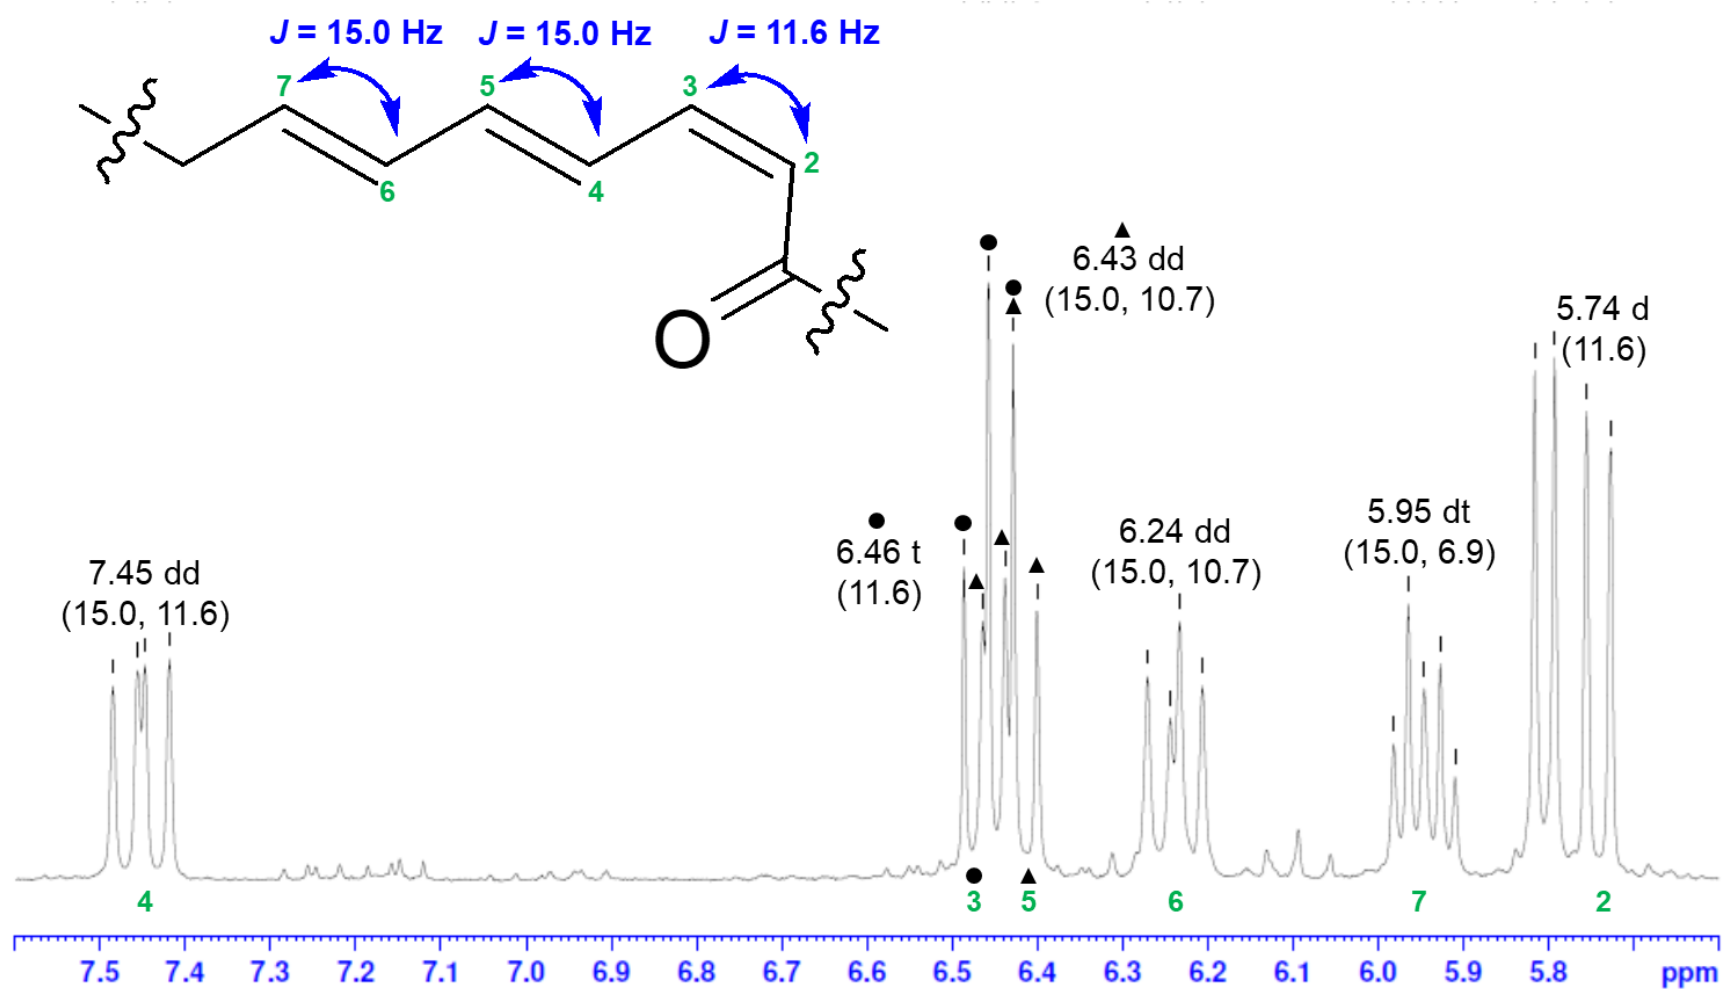

Figure S2-2.  $^1\text{H}$  NMR spectrum of 2Z-onnamide A (1) in MeOD (5.6-7.6 ppm).

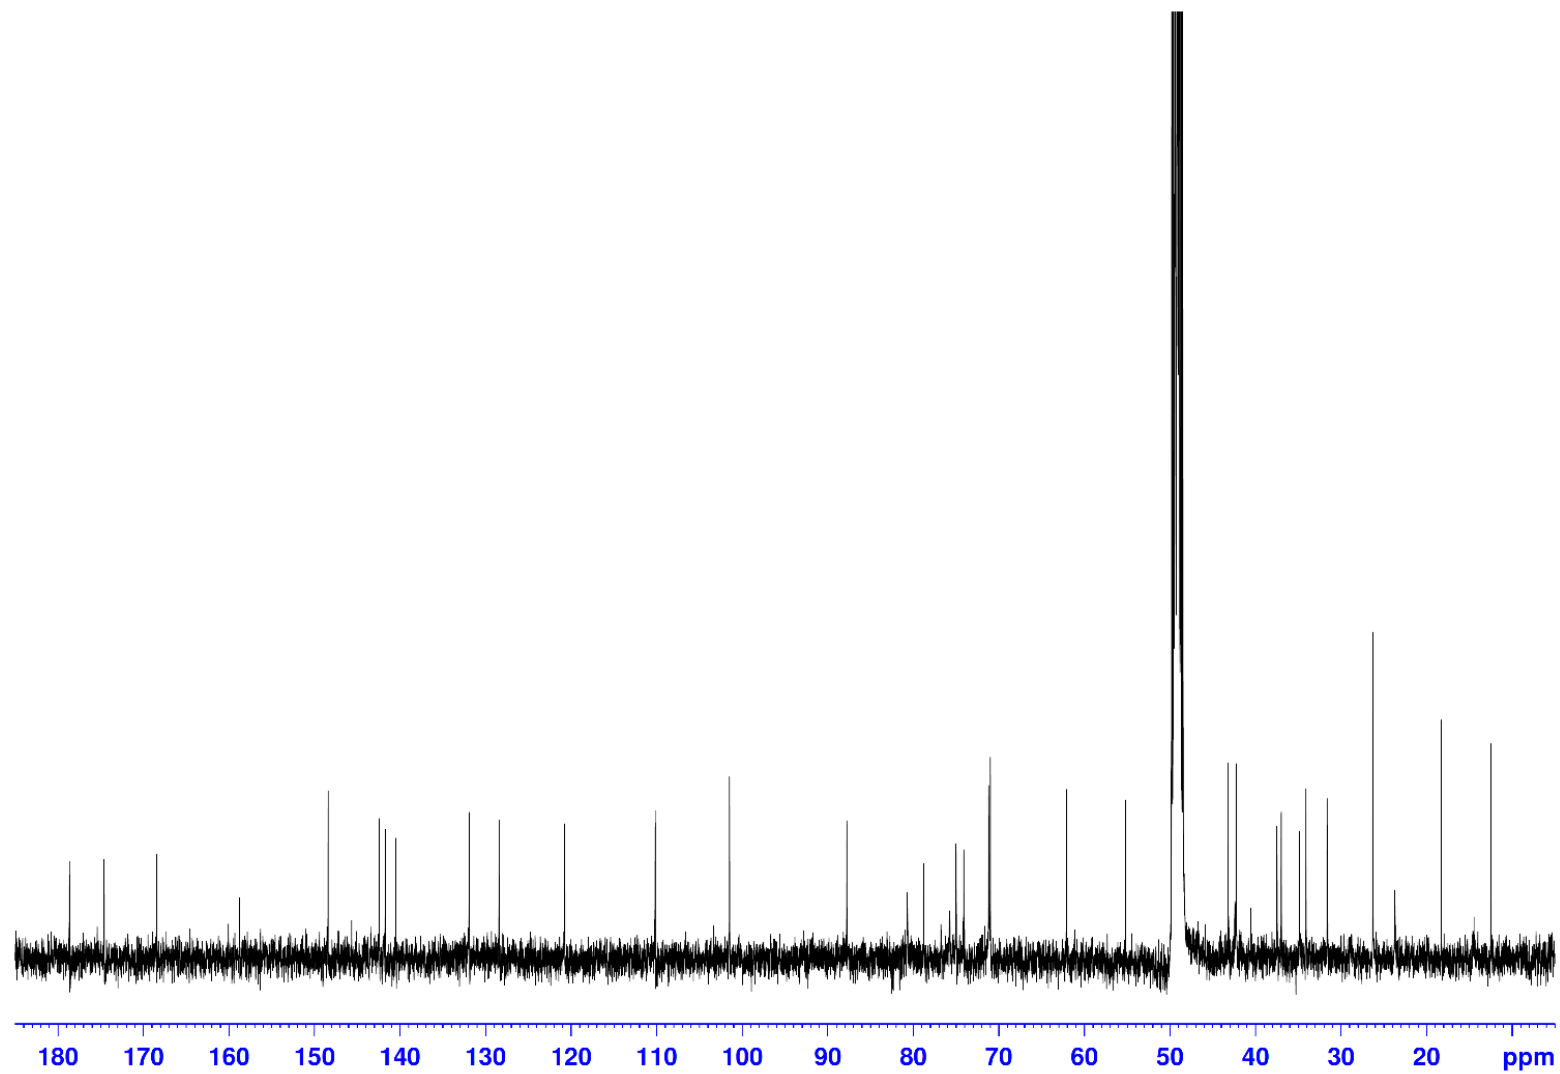

**Figure S3.**  $^{13}\text{C}$  NMR spectrum of 2Z-onnamide A (**1**) in MeOD.





**Figure S4.** COSY spectrum of 2Z-onnamide A (**1**) in MeOD.

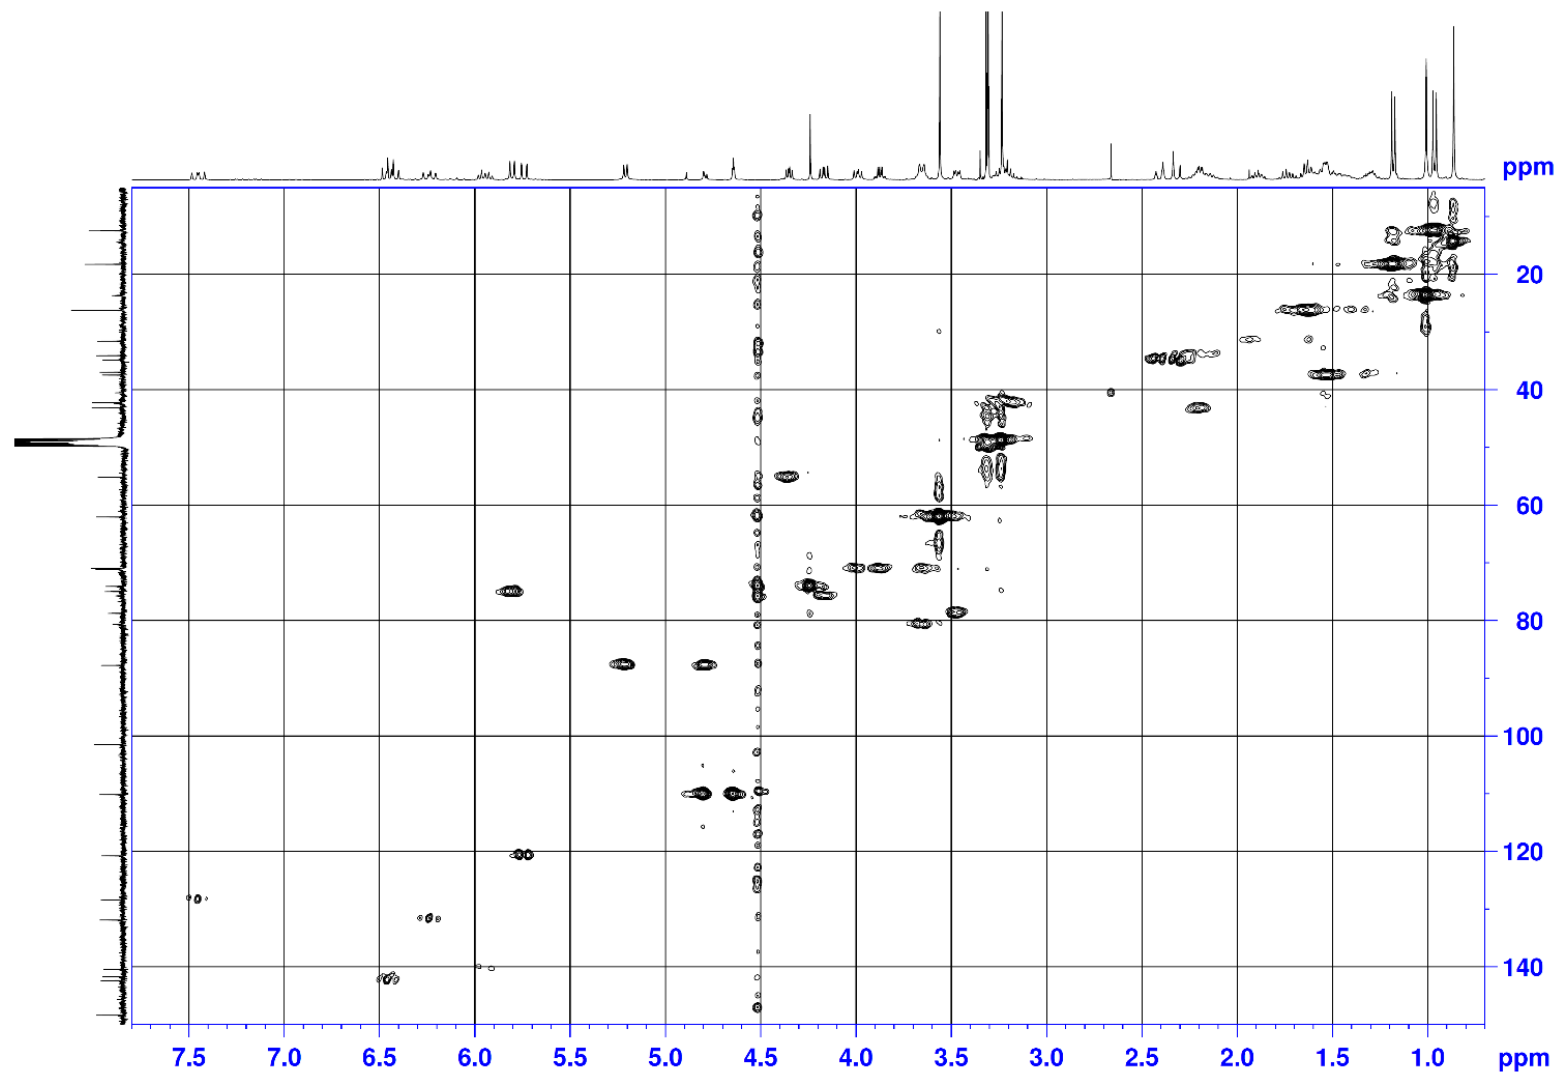

Figure S5. HMQC spectrum of 2Z-onnamide A (**1**) in MeOD.

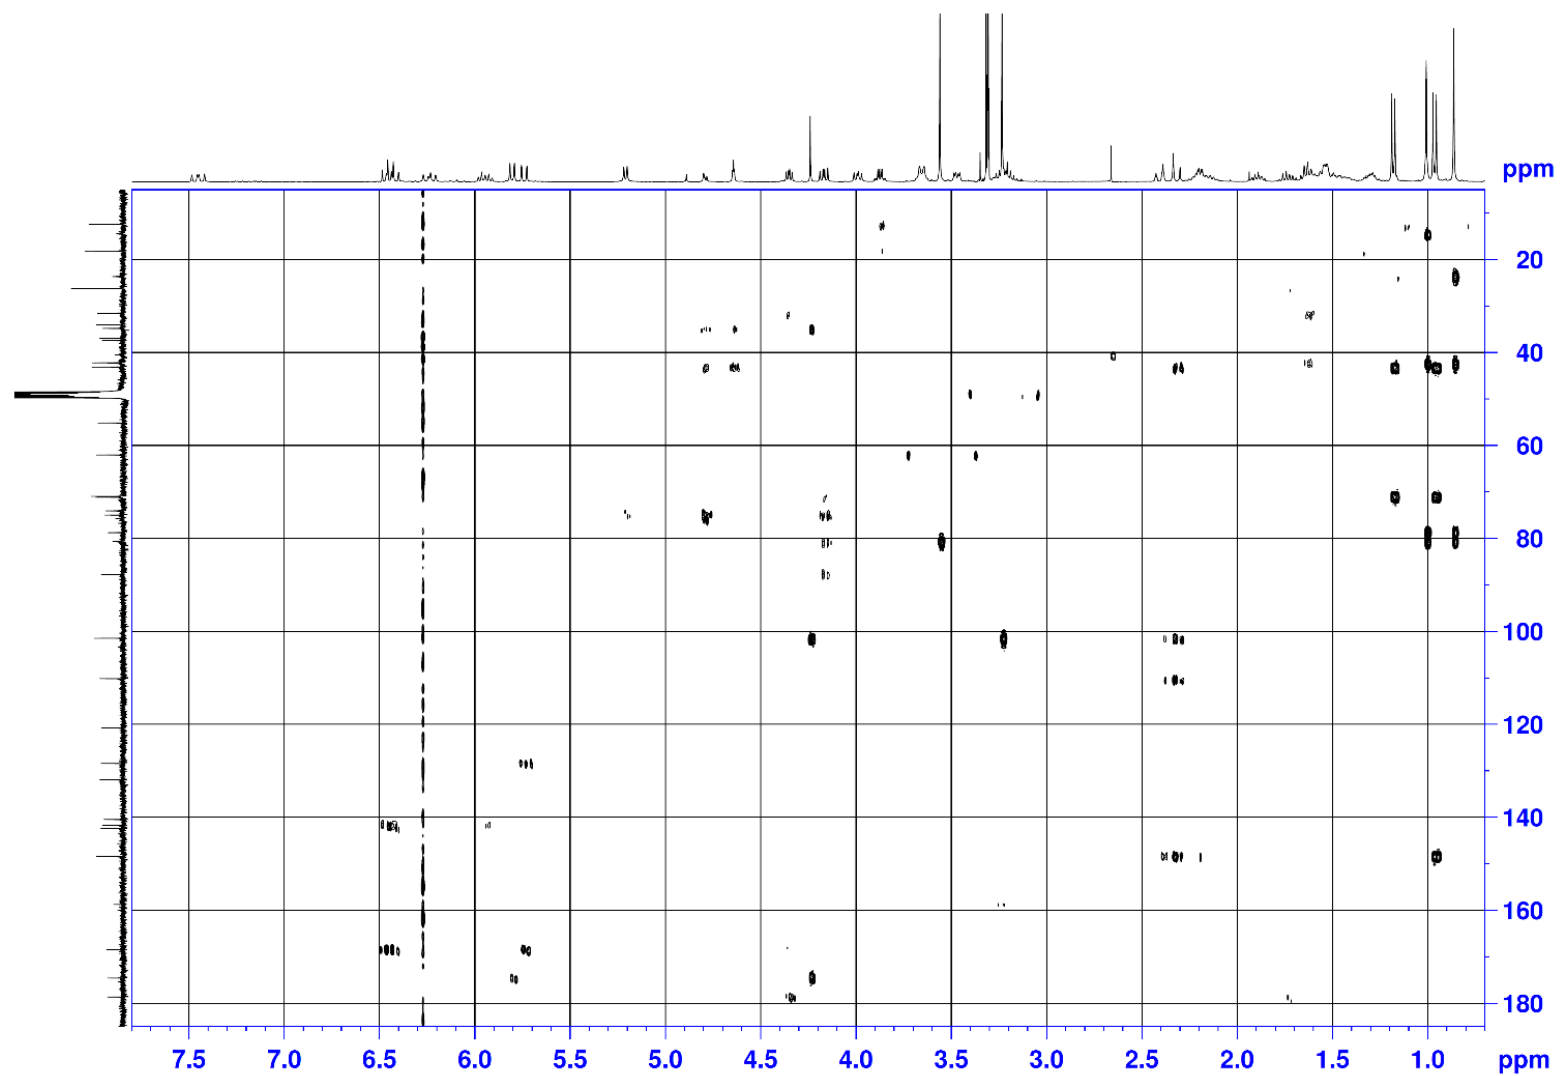

Figure S6. HMBC spectrum of 2Z-onnamide A (1) in MeOD.

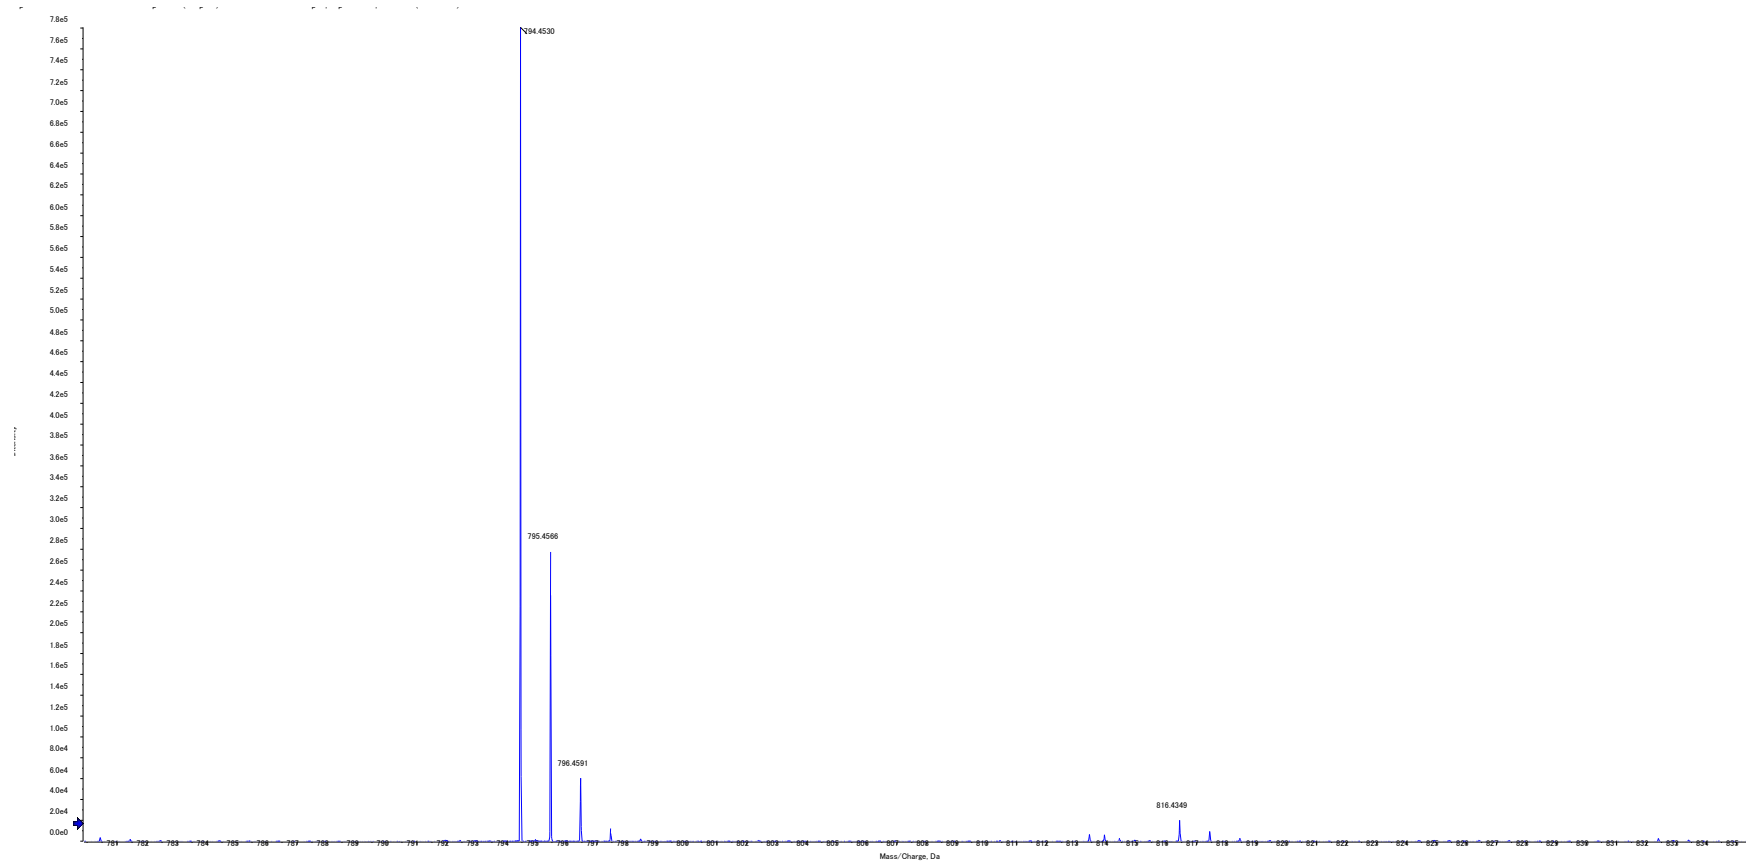

**Figure S7.** ESI spectrum (pos.) of 6Z-onnamide A (**2**).

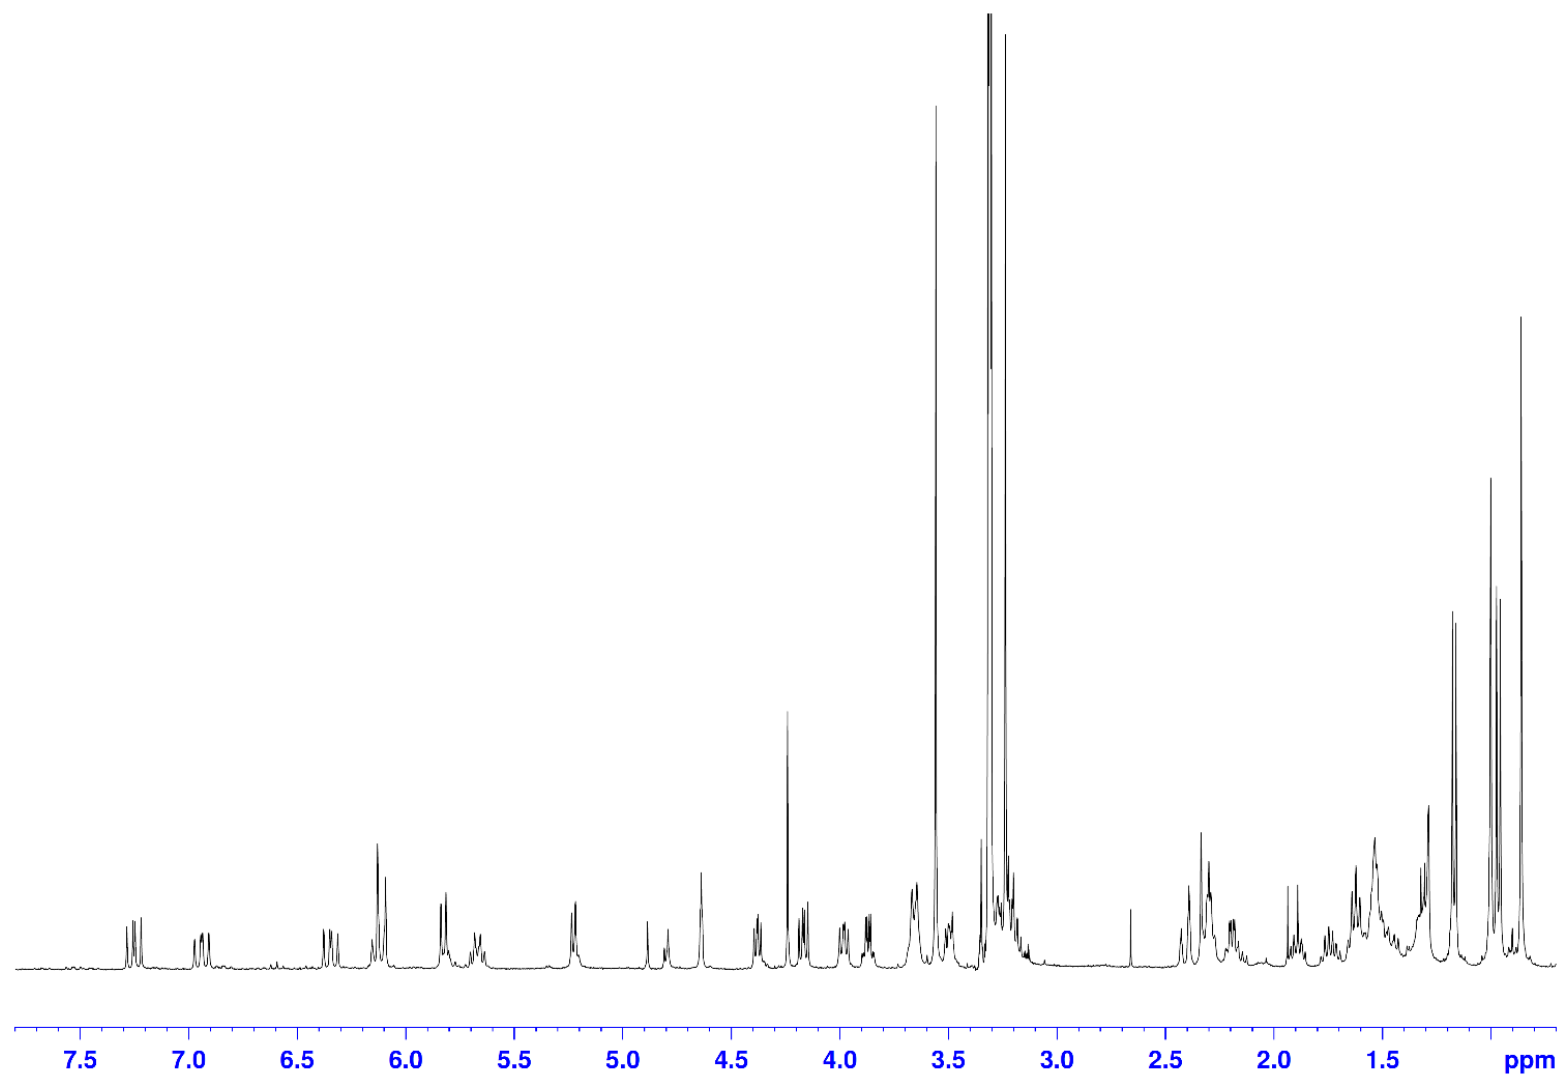

**Figure S8-1.**  $^1\text{H}$  NMR spectrum of 6Z-onnamide A (**2**) in MeOD.

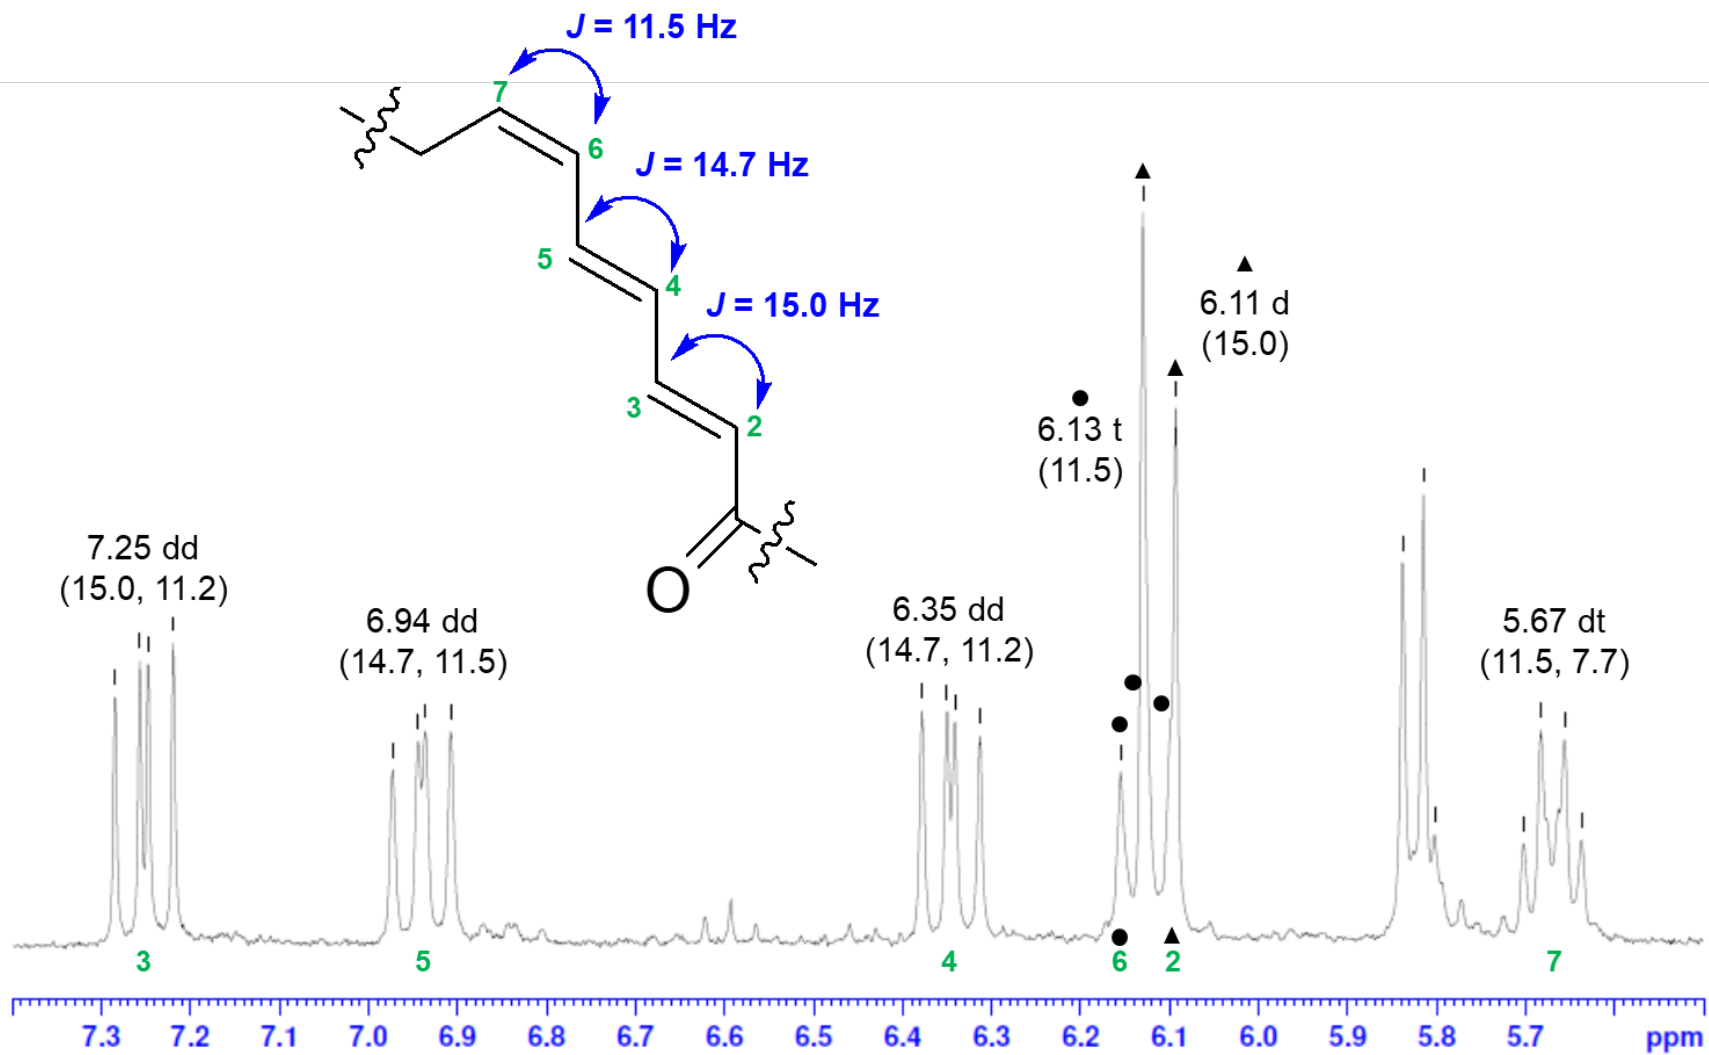

Figure S8-2.  $^1\text{H}$  NMR spectrum of 6Z-onnamide A (2) in MeOD (5.6-7.4 ppm).

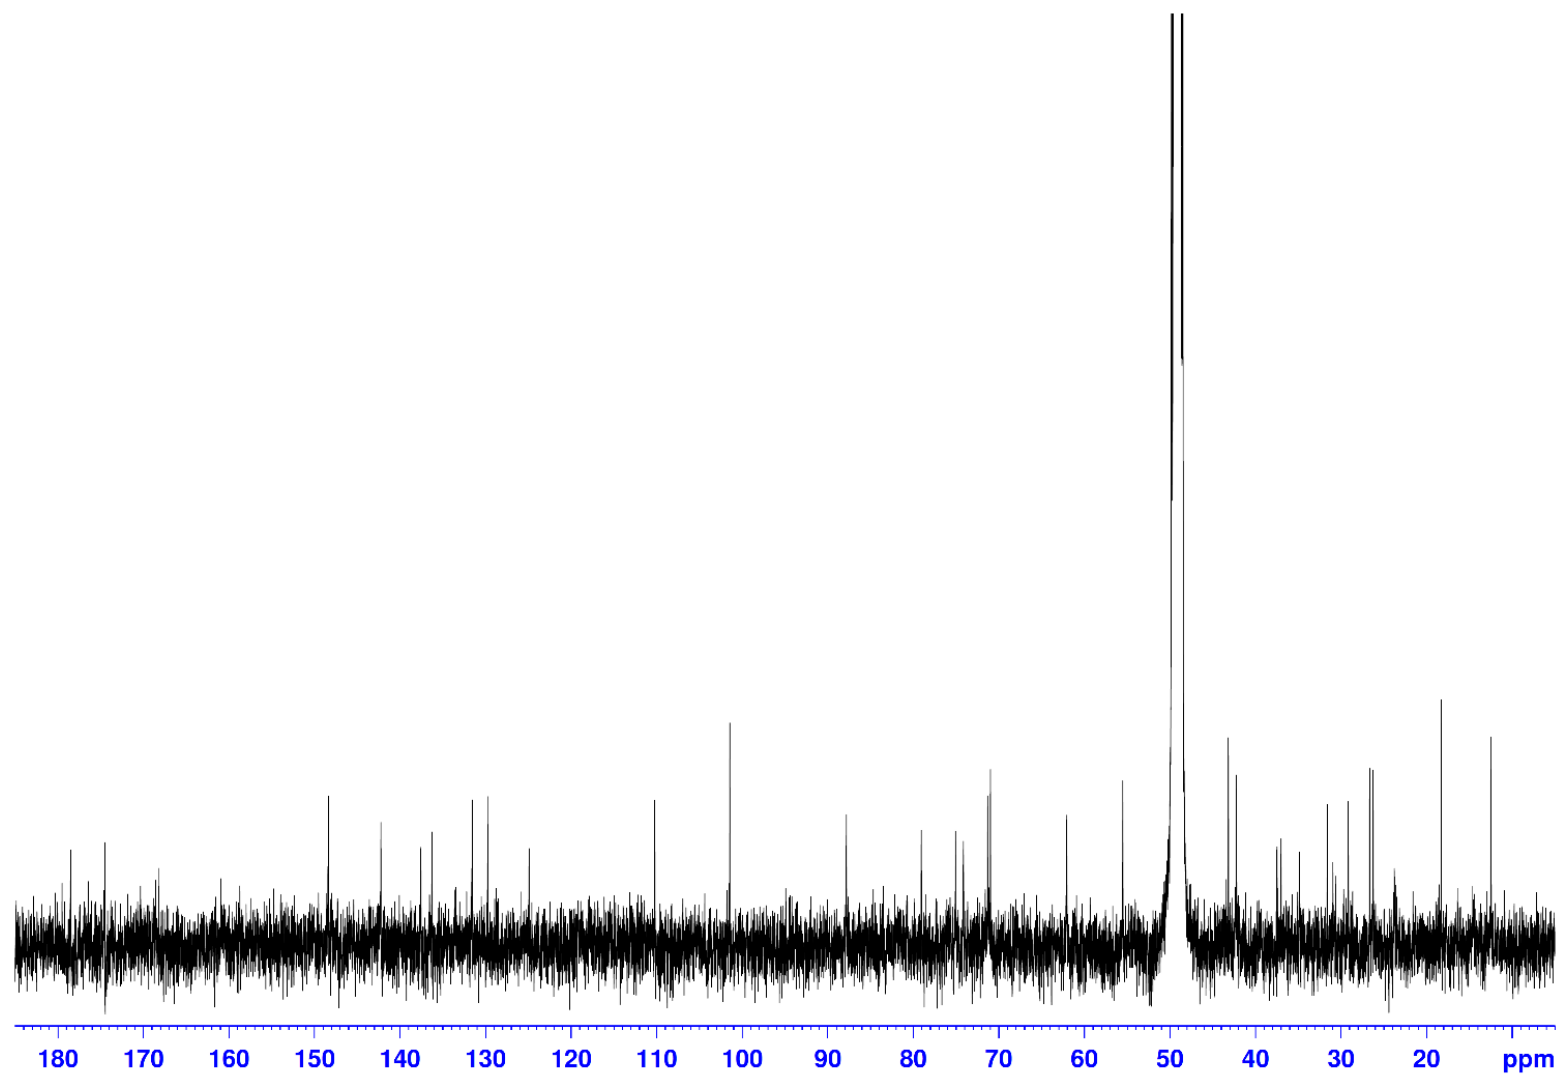

**Figure S9.**  $^{13}\text{C}$  NMR spectrum of 6Z-onnamide A (2) in MeOD.

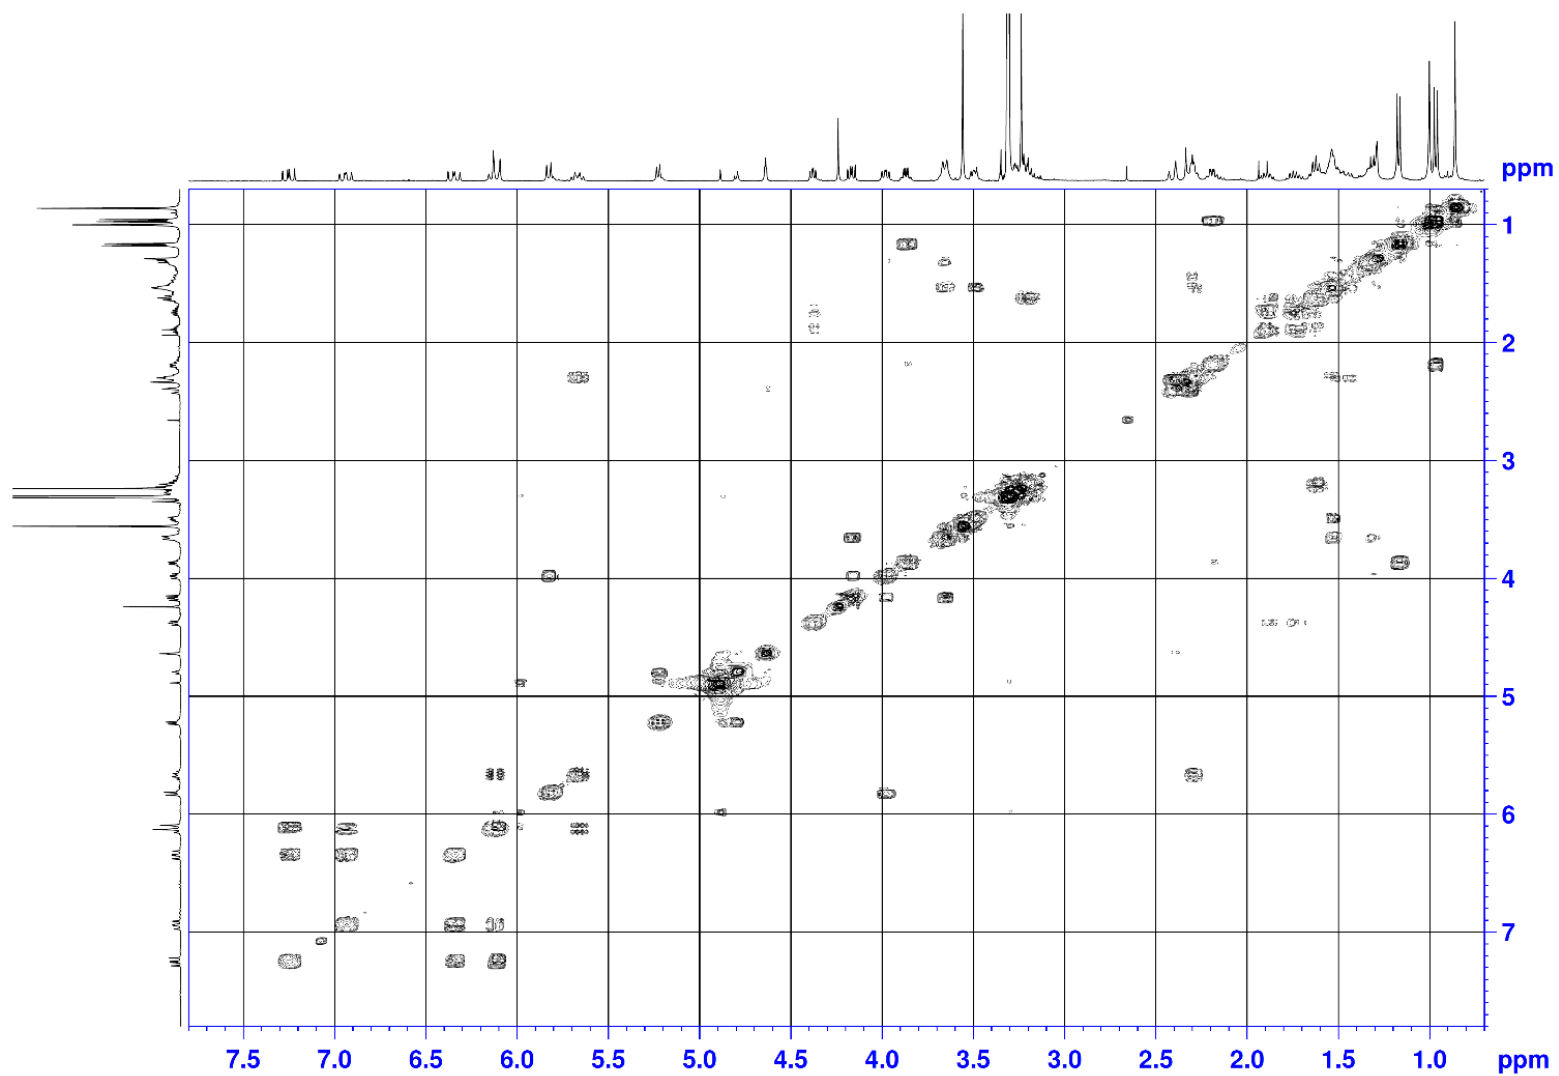

**Figure S10.** COSY spectrum of 6Z-onnamide A (2) in MeOD.



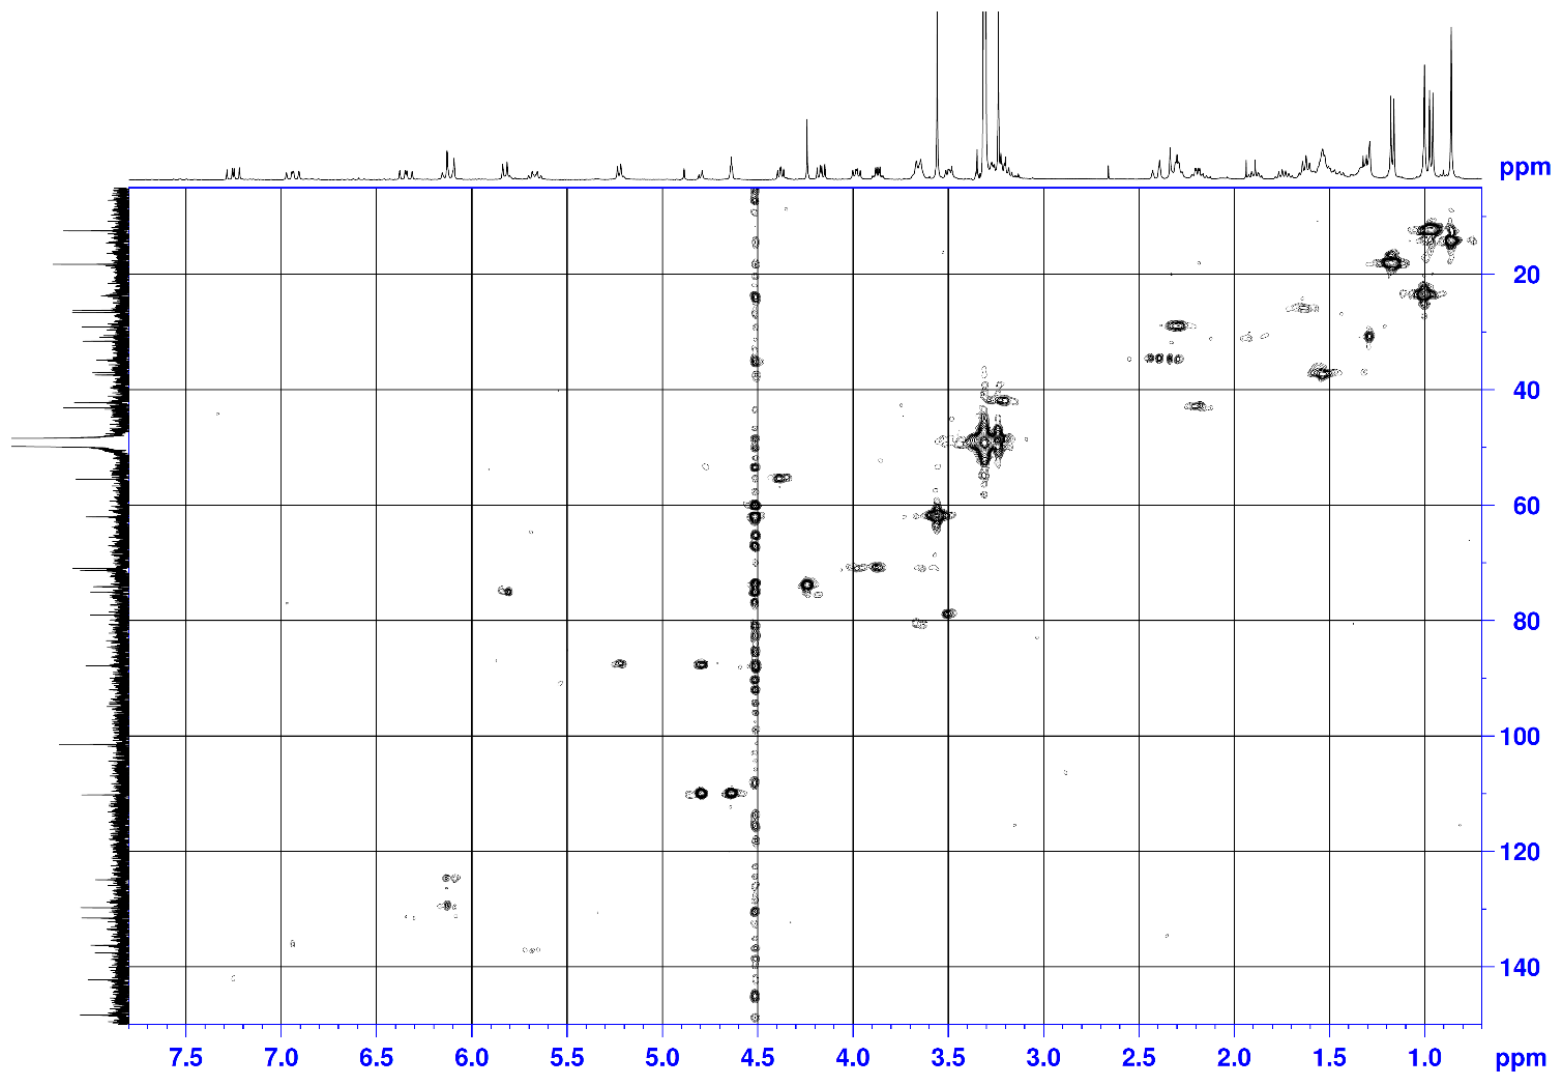

**Figure S11.** HMQC spectrum of 6Z-onnamide A (**2**) in MeOD.

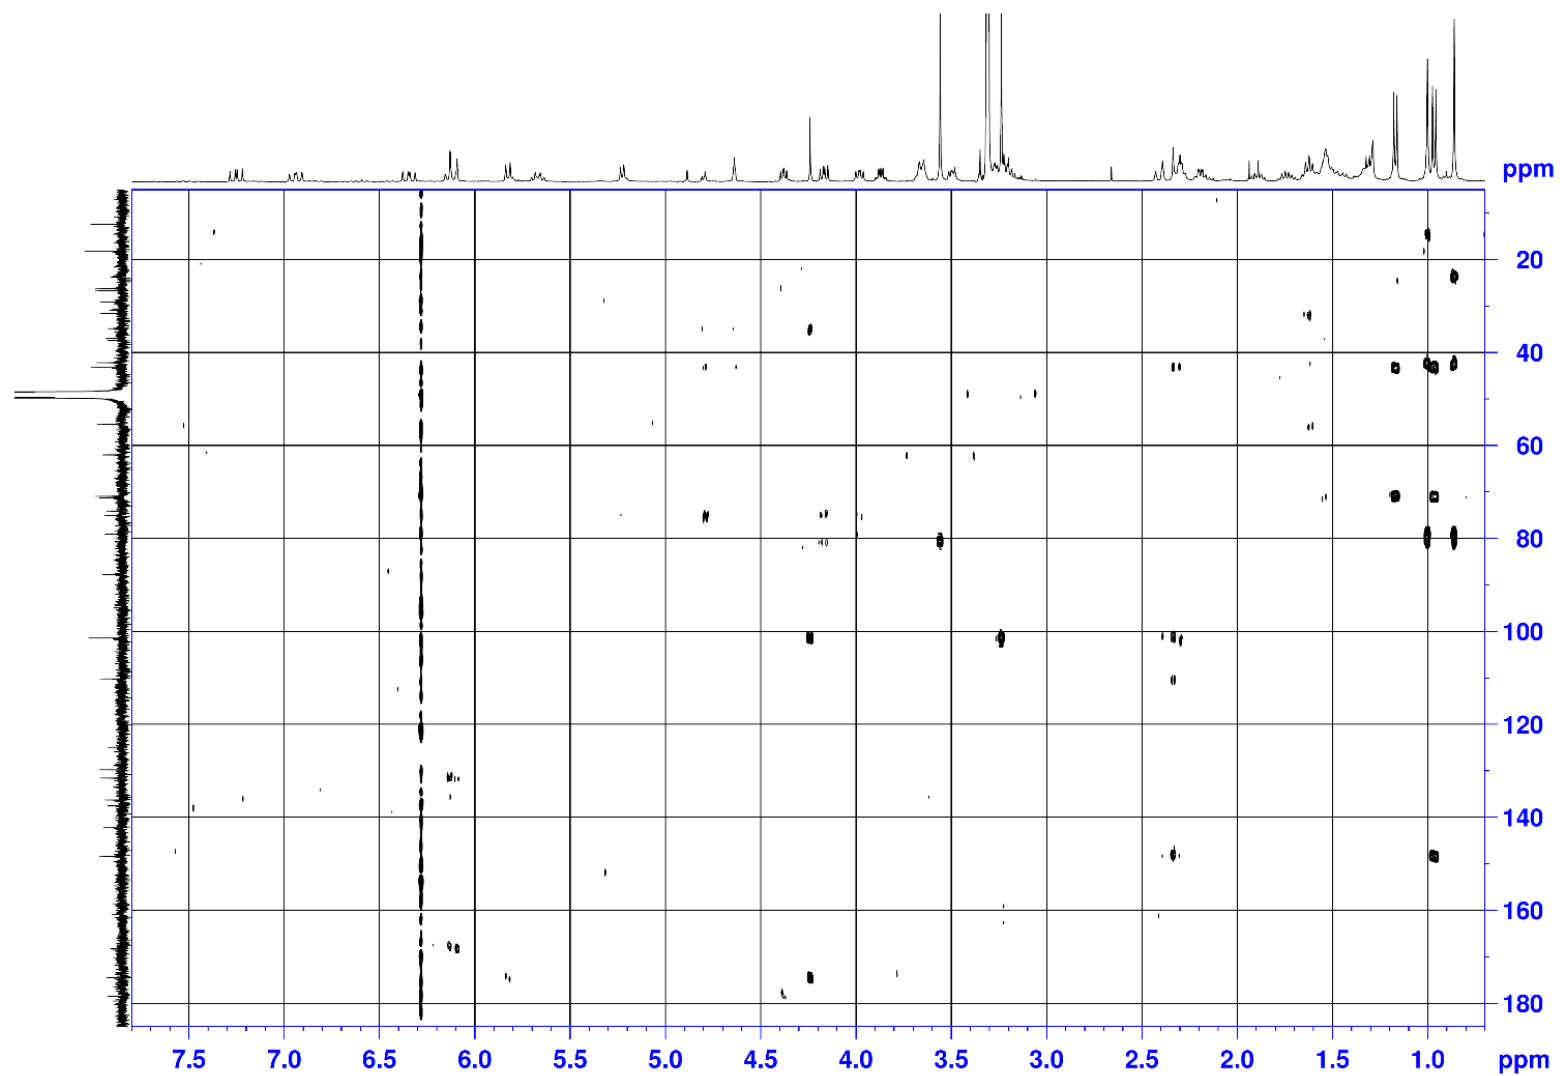

Figure S12. HMBC spectrum of 6Z-onnamide A (2) in MeOD.

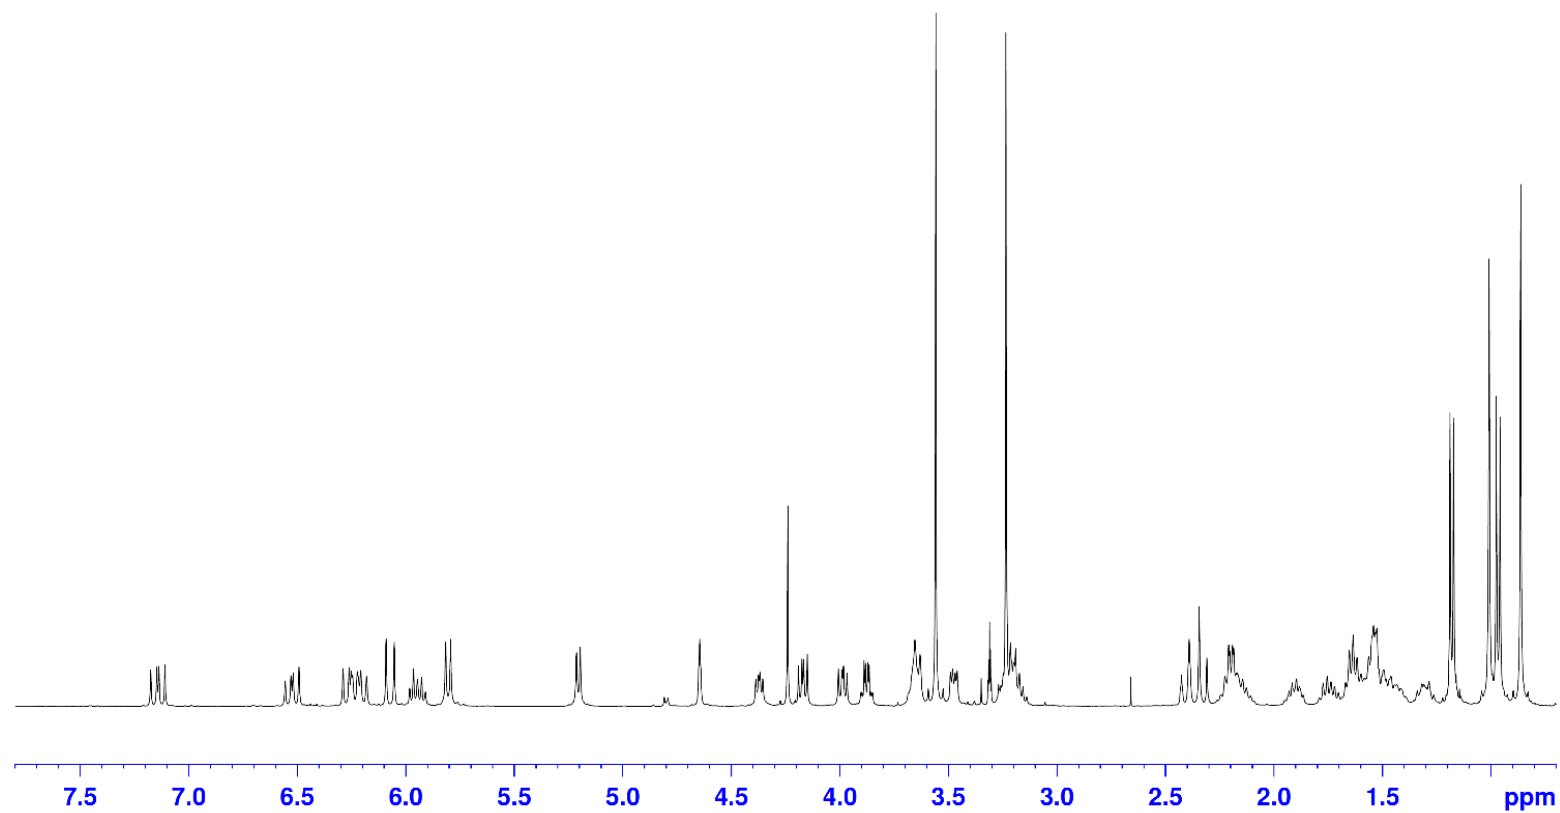

**Figure S13.**  $^1\text{H}$  NMR spectrum of onnamide A (3) in MeOD.

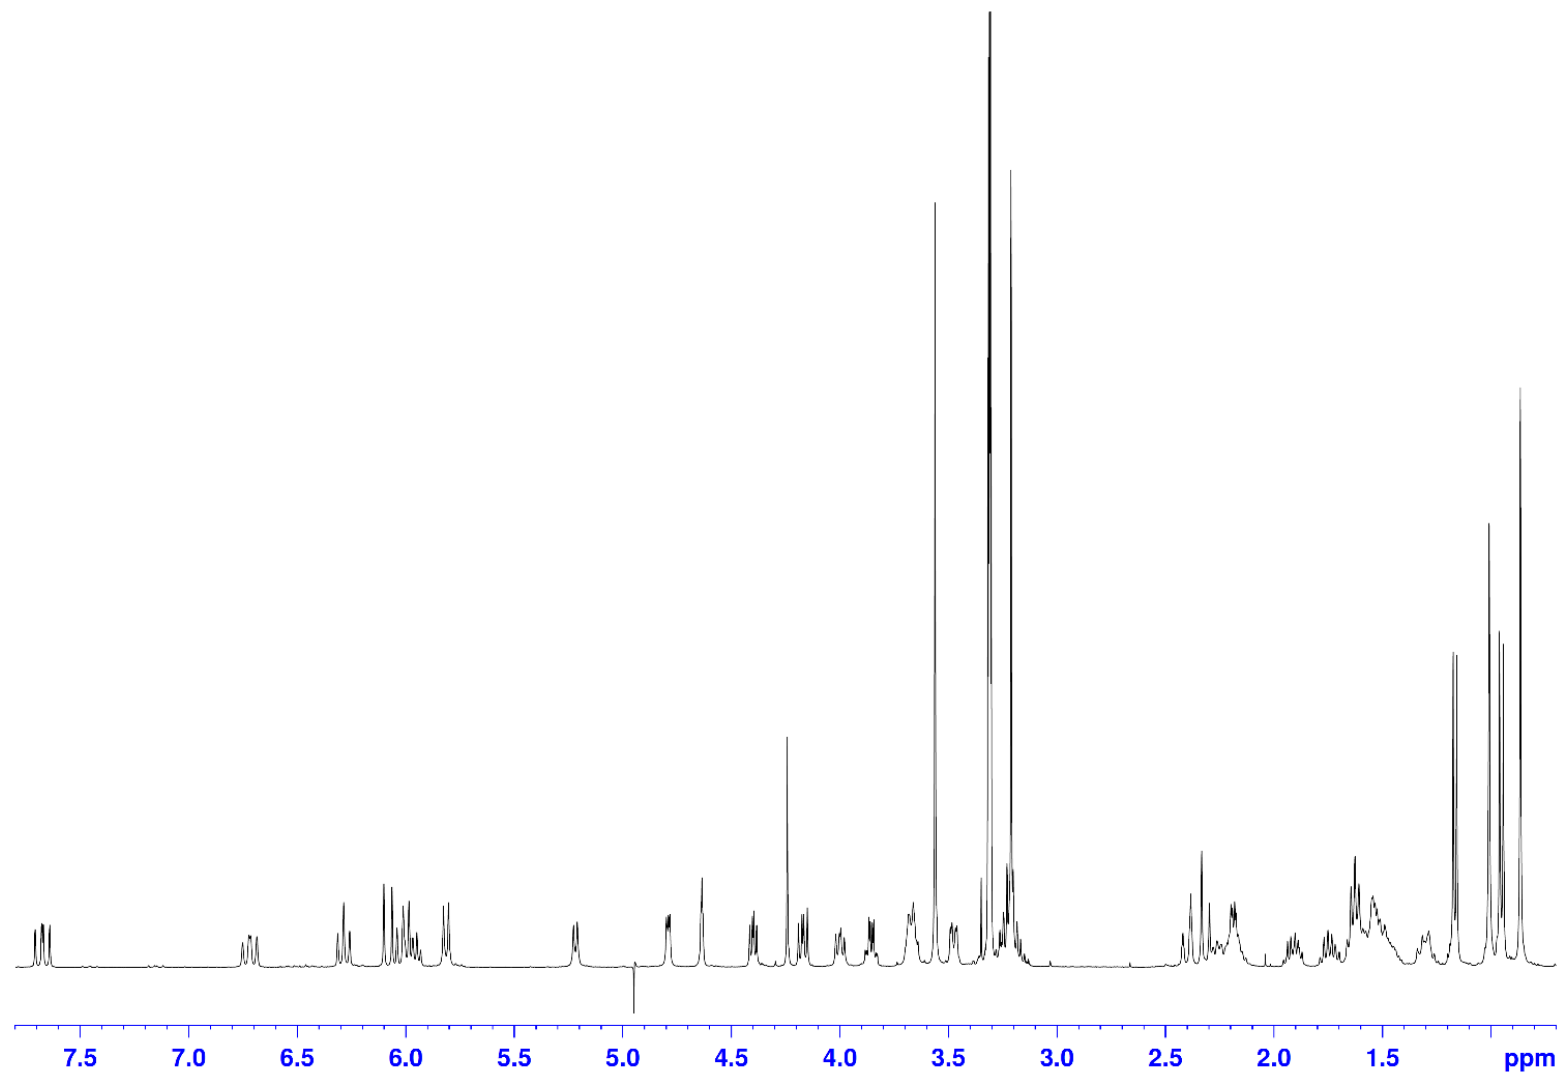

**Figure S14.**  $^1\text{H}$  NMR spectrum of 4Z-onnamide A (4) in MeOD.

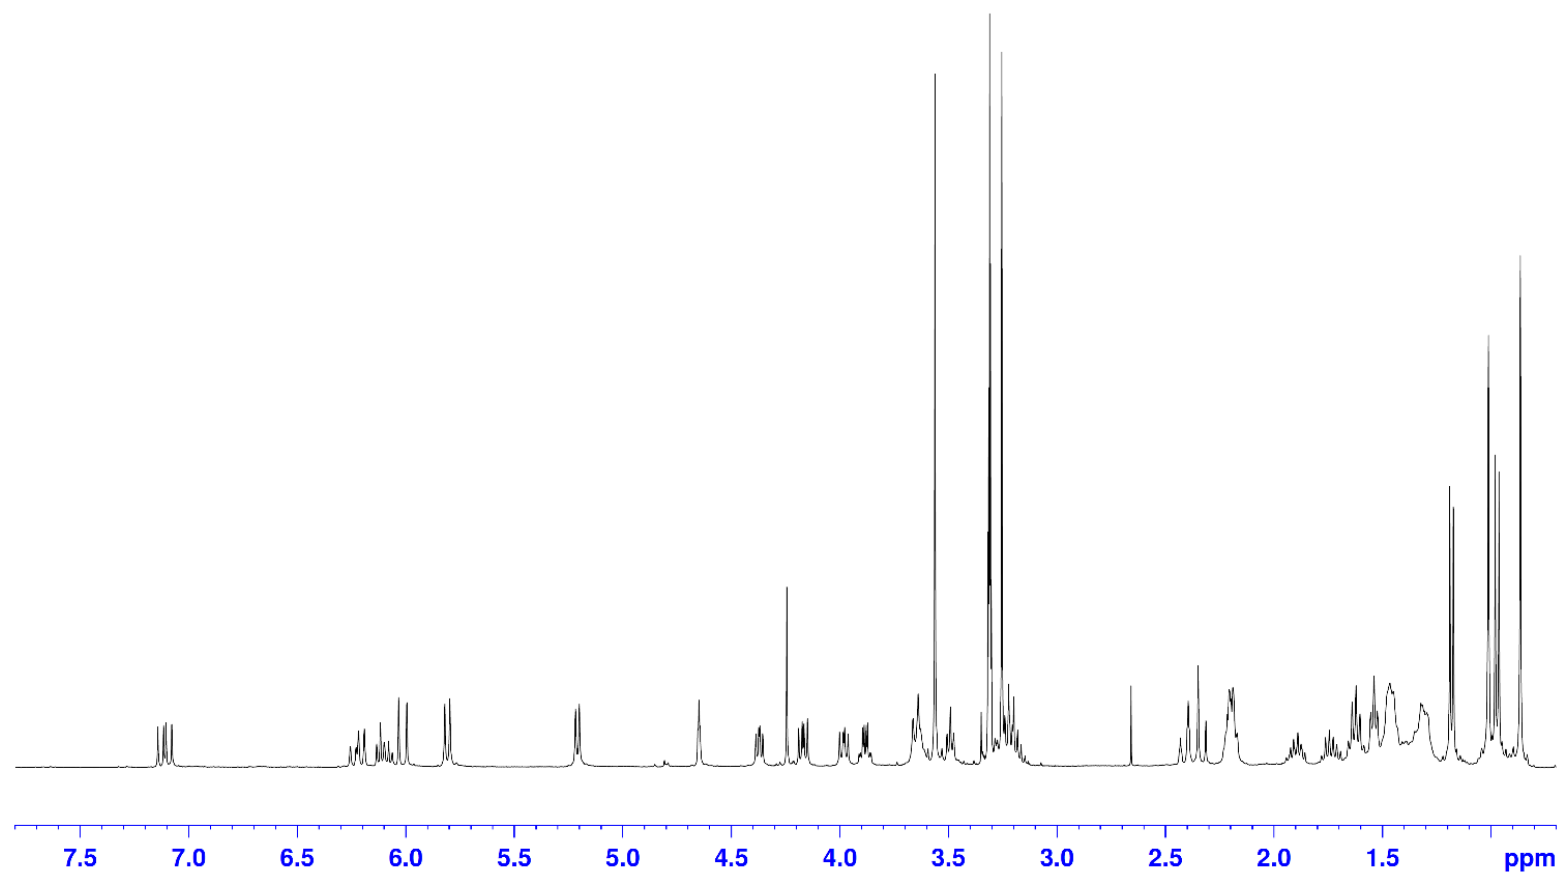

**Figure S15.**  $^1\text{H}$  NMR spectrum of dihydroonnamide A (5) in  $\text{MeOD}$ .

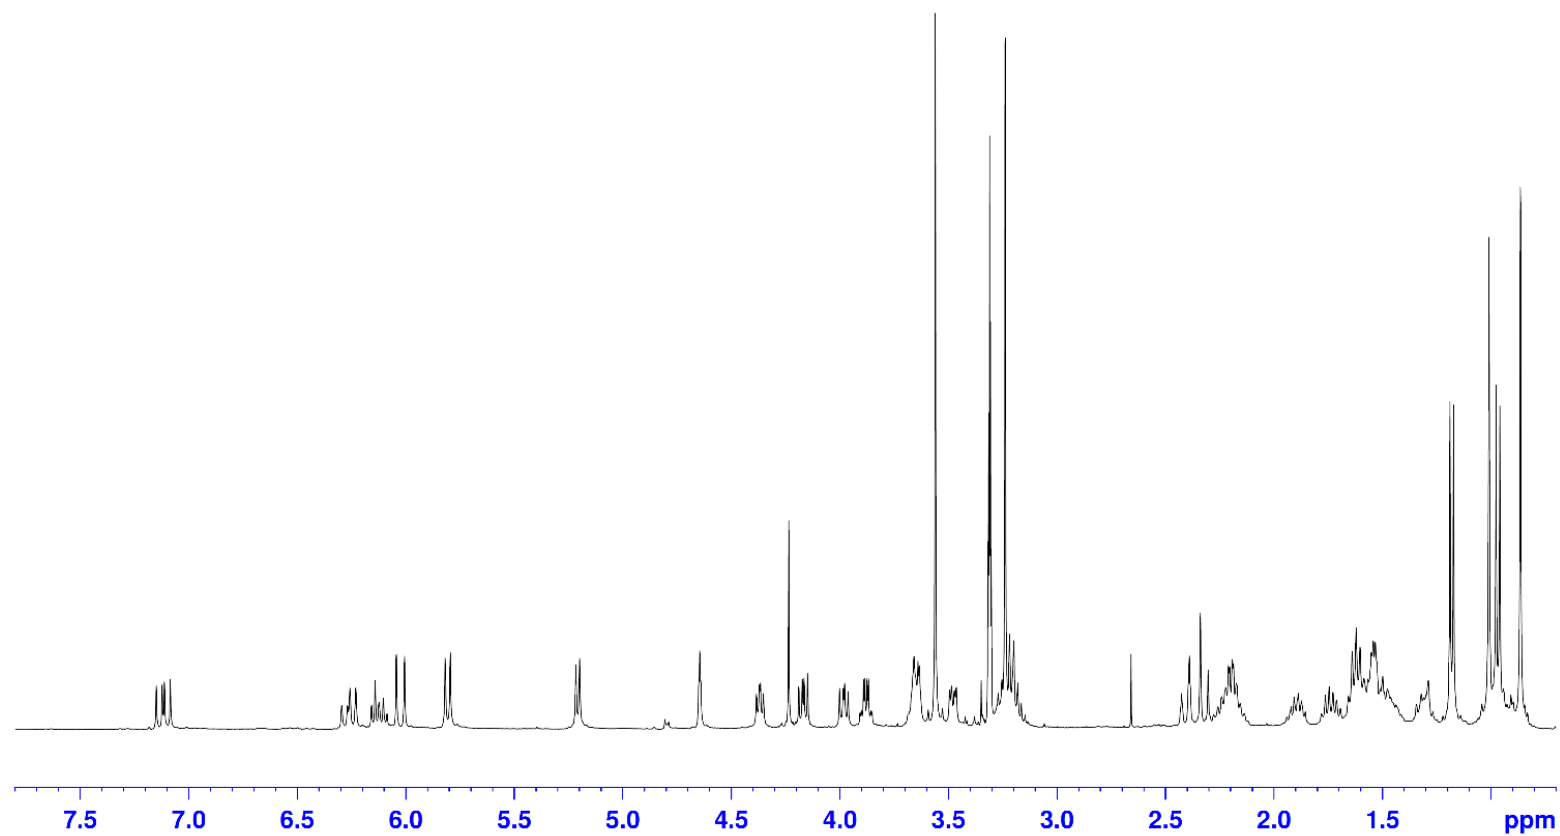

**Figure S16.**  $^1\text{H}$  NMR spectrum of onnamide B (6) in MeOD.

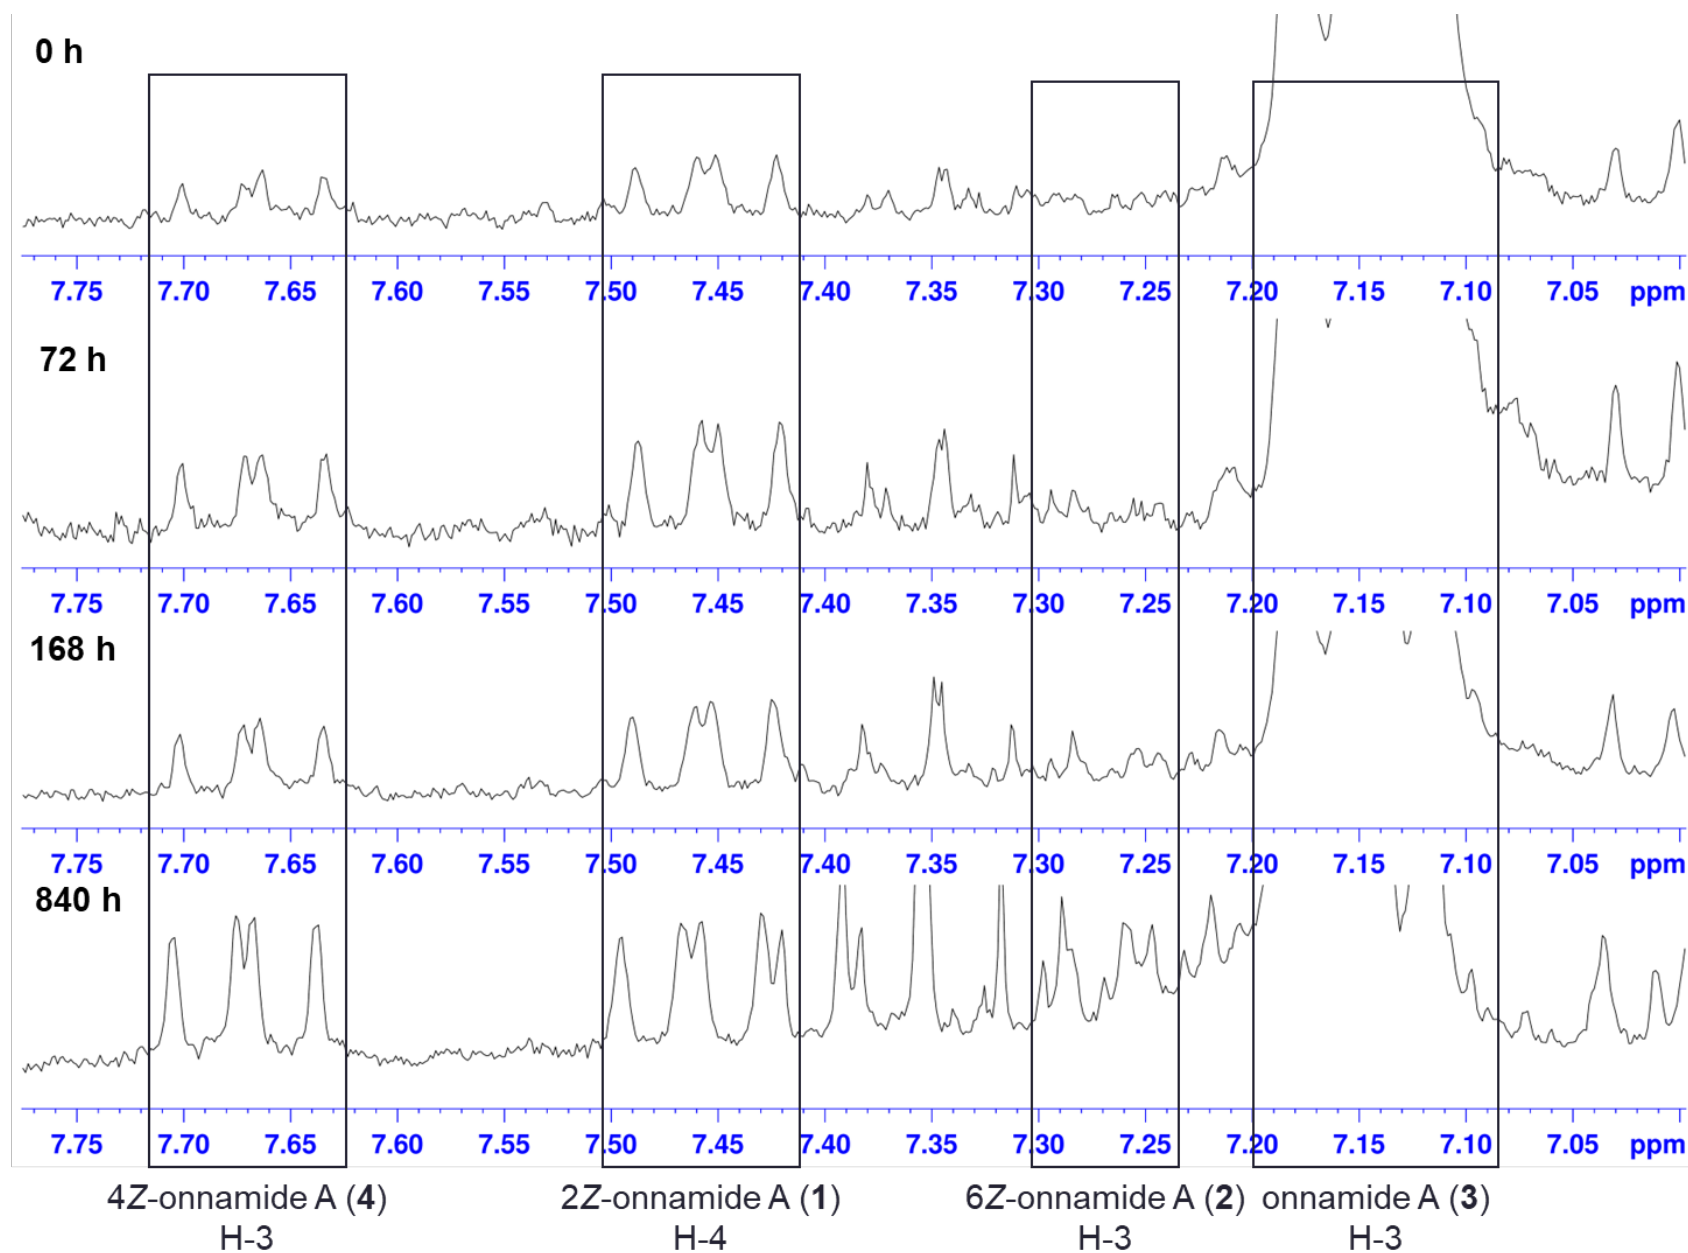

**Figure S17.**  $^1\text{H}$  NMR spectrum of onnamide A (3) over time in MeOD.

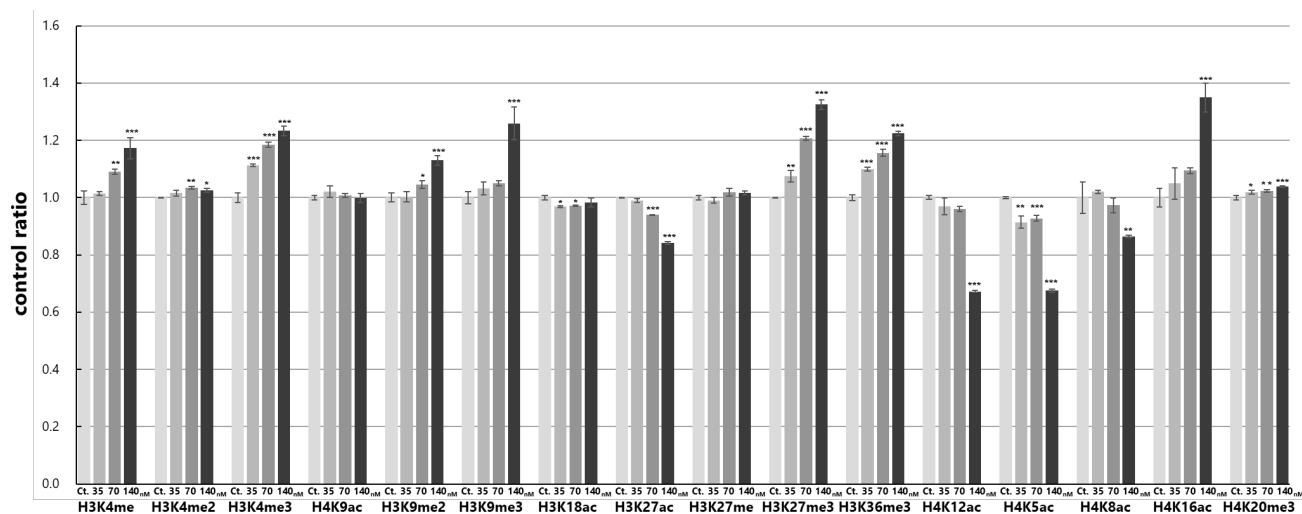

**Figure S18.** Effects of onnamide A (3) on 16 types of histone modifications. Quantification of each histone modification levels after cultivation under the medium containing each sample for 20 hours (n = 3, mean  $\pm$  S.D. \*\*\*: p < 0.001, \*\*: p < 0.01, \*: p < 0.05, Dunnett test).

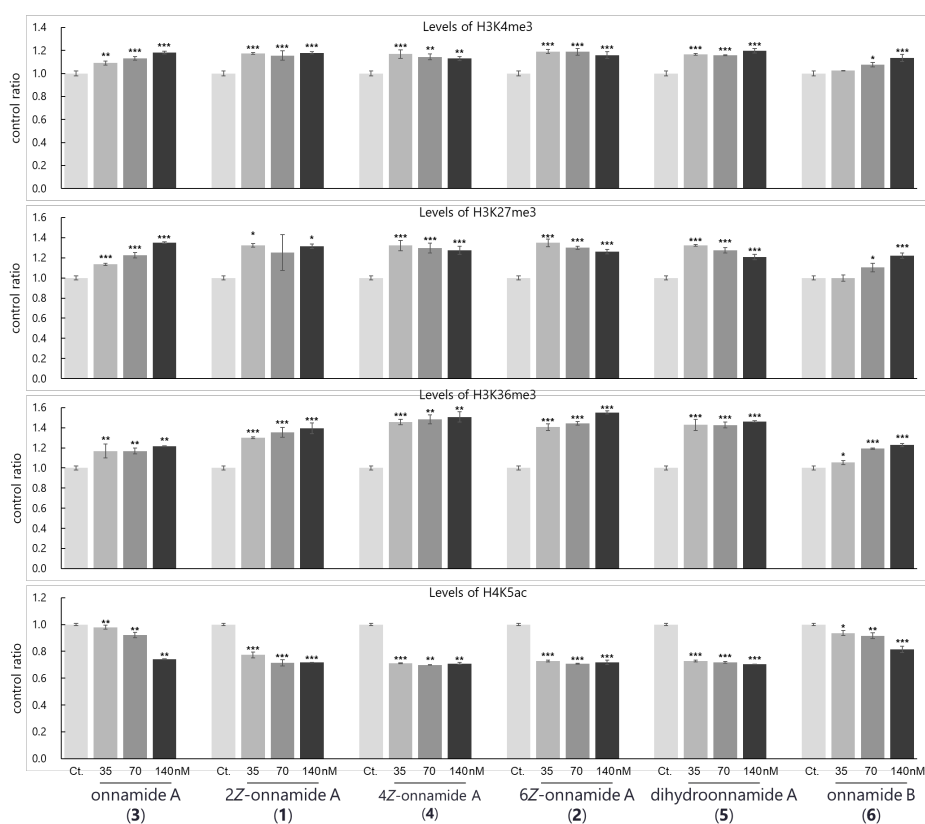

**Figure S19.** The levels of H3K4me3, H3K27me3, H3K36me3, and H4K5ac after onnamides (1-6)



treatment in histone modification assay (Ct.: DMSO, n = 3, mean  $\pm$  S.D. \*\*\*:  $p < 0.001$ , \*\*:  $p < 0.01$ , \*:  $p < 0.05$ , Dunnett test).

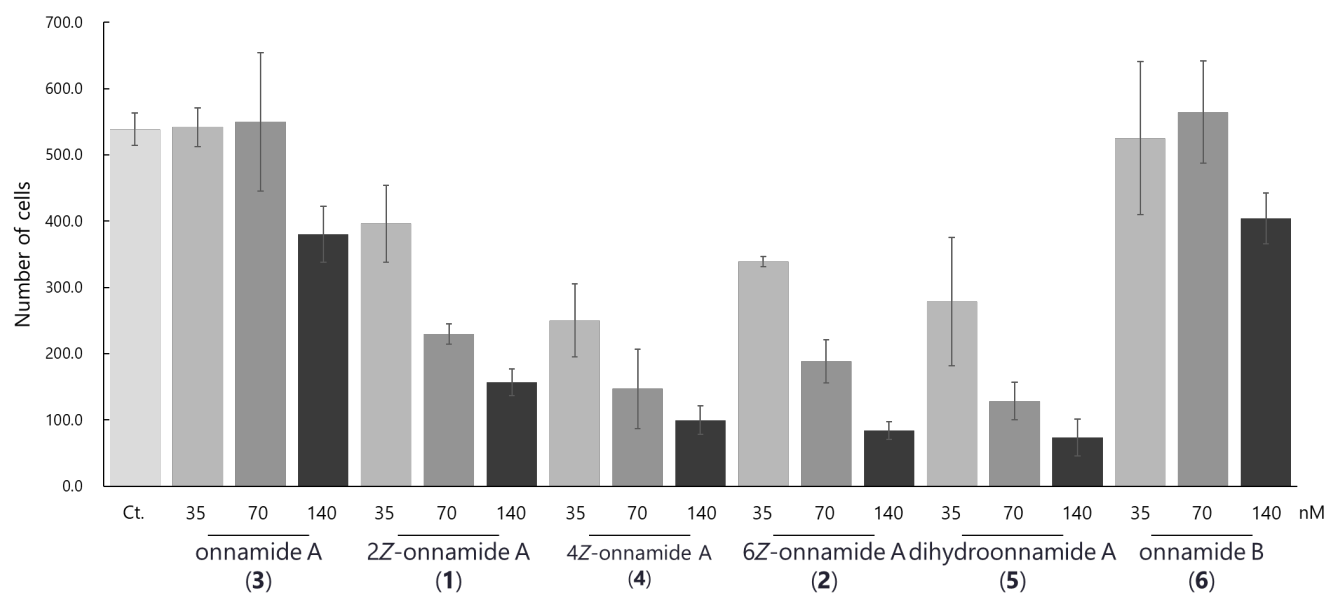

**Figure S20.** Effect of onnamides (1-6) treatment on number of cells in histone modification assay (Ct.: DMSO, n = 3, mean  $\pm$  S.D.).

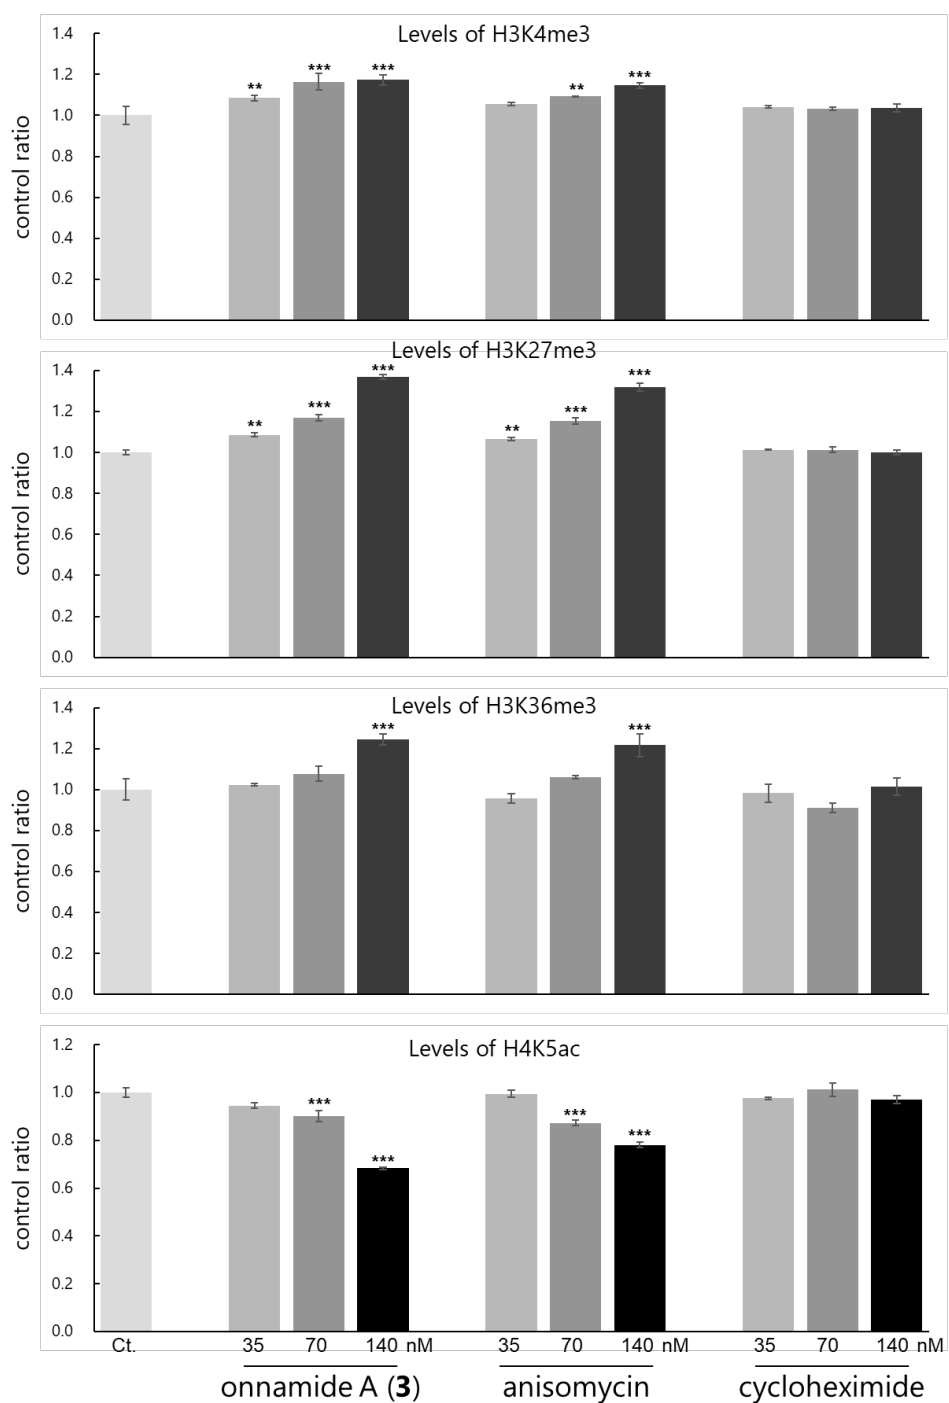

**Figure S21.** The levels of H3K4me3, H3K27me3, H3K36me3, and H4K5ac after onnamide A (3) and anisomycin treatment in histone modification assay. (Ct.: DMSO,  $n = 3$ , mean  $\pm$  S.D. \*\*\*:  $p < 0.001$ , \*\*:  $p < 0.01$ , Dunnett test).
